# Supplementary material
Source: ML conference proceedings conference paper supplement (https://openreview.net/forum?id=TwyEk7HzJb6)
Supplement: supplementary_material [file attachment]

---

# Bandit Learning in Many-to-one Matching Markets with Uniqueness Conditions

---

Anonymous Author(s)

Affiliation

Address

email

## Abstract

1 An emerging line of research is dedicated to the problem of one-to-one matching  
2 markets with bandits, where the preference of one side is unknown and thus we  
3 need to match while learning the preference through multiple rounds of interaction.  
4 However, in many real-world applications such as online recruitment platform for  
5 short-term workers, one side of the market can select more than one participant from  
6 the other side, which motivates the study of the many-to-one matching problem.  
7 Moreover, the existence of a unique stable matching is crucial to the competitive  
8 equilibrium of the market. In this paper, we first introduce a more general new  $\tilde{\alpha}$ -  
9 condition to guarantee the uniqueness of stable matching in many-to-one matching  
10 problems, which generalizes some established uniqueness conditions such as *SPC*  
11 and *Serial Dictatorship*, and recovers the known  $\alpha$ -condition if the problem is  
12 reduced to one-to-one matching. Under this new condition, we design an MO-  
13 UCB-D4 algorithm with  $O\left(\frac{NK \log(T)}{\Delta^2}\right)$  regret bound, where  $T$  is the time horizon,  
14  $N$  is the number of agents,  $K$  is the number of arms, and  $\Delta$  is the minimum  
15 reward gap. Extensive experiments show that our algorithm achieves uniform good  
16 performances under different uniqueness conditions.

## 17 1 Introduction

18 The rise of platforms for the online matching market has led to an emergence of opportunities for  
19 companies to participate in personalized decision-making [14, 18]. Companies (like Thumbtack  
20 and Taskrabbit and Upwork platforms) use online platforms to address short-term needs or seasonal  
21 spikes in production demands, accommodate workers who are voluntarily looking for more flexible  
22 work arrangements or probation period before permanent employment. The supply and demand  
23 sides in two-sided markets make policies on the basis of their diversified needs, which is abstracted  
24 as a matching market with agent side and arm side, and each side has a preference profile over the  
25 opposite side. They choose from the other side according to preference and perform a matching. The  
26 stability of the matching result is a key property of the market [32, 1, 27].

27 The preferences in the online labor market may be unknown to one side in advance, thus matching  
28 while learning the preferences is necessary. The multi-armed bandit (MAB) [36, 13, 4] is an important  
29 tool for  $N$  independent agents in matching market simultaneously selecting arms adaptively from  
30 received rewards at each round. The idea of applying MAB to one-to-one matching problems,  
31 introduced by [21], assumes that there is a central platform to make decisions for all agents. Following  
32 this, other works [22, 34, 7] consider a more general decentralized setting where there is no central  
33 platform to arrange matchings, and our work is also based on this setting.

34 However, it is not enough to just study the one-to-one setting. Take online short-term worker  
35 employment as an example, it is an online platform design with an iterative matching, where

employers have numerous similar short-term tasks or internships to be recruited. Workers can only choose one task according to the company’s needs at a time while one company can accept more than one employee. Each company makes a fixed ranking for candidates according to its own requirements but workers have no knowledge of companies’ preferences. The reward for workers is a comprehensive consideration of salary and job environment. Since tasks are short-term, each candidate can try many times in different companies to choose the most suitable job. We abstract companies as arms and workers as agents. Each arm has a *capacity*  $q$  which is the maximum number of agents this arm can accommodate. When an arm faces multiple choices, it accepts its most  $q$  preferred agents. Agents thus compete for arms and may receive zero reward if losing the conflict. It is worth mentioning that arms with capacity  $q$  in the many-to-one matching can not just be replaced by  $q$  independent individuals with the same preference since there would be implicit competition among different replicates of this arm, not equal treatment. In addition, when multiple agents select one arm at a time, there may be no collision, which will hinder the communication among different agents under the decentralized assumption. They cannot distinguish who is more preferred by this arm in one round as it can accept more than one agent while this can be done in one-to-one case. Communication here lets each agent learn more about the preferences of arms and other agents, so as to formulate better policies to reduce collisions and learn fast about their stable results.

This work focuses on a many-to-one market under uniqueness conditions. Previous work [10, 15] emphasize the importance of constructing a unique stable matching for the equilibrium of matching problems and some existing uniqueness conditions are studied in many-to-one matching, such as *Sequential Preference Condition (SPC)* and *Acyclicity* [26, 2]. Our work is motivated by [7], but the unique one-to-one mapping between arms and agents in their study which gives a surrogate threshold for arm elimination does not work in the many-to-one setting. And the uniqueness conditions in many-to-one matching are not well-studied, which also brings a challenge to identify and leverage the relationship between the resulting stable matching and preferences of two sides in the design of bandit algorithms. We propose an  $\tilde{\alpha}$ -condition that can guarantee a unique stable matching and recover  $\alpha$ -condition [19] if reduced to the one-to-one setting. We establish the relationships between our new  $\tilde{\alpha}$ -condition and existing uniqueness conditions in many-to-one setting.

In this paper, we study the bandit algorithm for a decentralized many-to-one matching market with uniqueness conditions. Under our newly introduced  $\tilde{\alpha}$ -condition, we design an MO-UCB-D4 algorithm with arm elimination and the regret can be upper bounded by  $O\left(\frac{NK \log(T)}{\Delta^2}\right)$ , where  $N$  is the number of agents,  $K$  is the number of arms, and  $\Delta$  is the minimum reward gap. Finally, we conduct a series of experiments to simulate our algorithm under various conditions of *Serial dictatorship*, *SPC* and  $\tilde{\alpha}$ -condition to study the stability and regret of the algorithm.

**Related Work** The study of matching markets has a long history in economics and operation research [8, 6, 32] with real applications like school enrollment, labor employment, hospital resource allocation, and so on [1, 23, 31, 17]. A salient feature of market matching is making decisions for competing players on both sides [36, 12]. MAB is an important tool to study matching problems under uncertainty to obtain a maximum reward, and upper confidence bound algorithm (UCB) [4] is a typical algorithm, which sets a confidence interval to represent uncertainty. Matching market with MAB is studied in both centralized and decentralized setting [21, 22]. Following these, Abishek Sankararaman et al. [34] propose a phased UCB algorithm under a uniqueness condition, *Serial Dictatorship*, to manage collisions. They solve the problem of the decentralized market without knowing arm-gaps or time horizon, and reduce the probability of linear regret through non-monotonic arm elimination. The introduction of the uniqueness condition plays an important role in the equilibrium of matching results [15, 7]. Under a stronger and robust condition, Uniqueness Consistency [19], Soumya Basu et al. [7] apply MAB to online matching and obtain robust results that the subset of stable matchings being separated from the system does not affect other stable matchings.

We discuss many-to-one problems such as online short-term employment and MOOC [14, 24, 18] as the one-to-one setting has limitations in practice. Somouaoga Bonkoungo [9] runs a student-proposing deferred acceptance algorithm (DA) [12] to study decentralized college admission. Ahmet Altinok [3] considers dynamic matching in many-to-one that can be solved as if it is static many-to-one or dynamic one-to-one under certain assumptions. As the existence and uniqueness of competitive equilibrium and core are important to allocations, the unique stable results need to be considered [27]. Similar to conditions for unique stable matching in one-to-one, some uniqueness conditions of stable results in the many-to-one setting also are studied [16, 28, 15, 2, 27].

## 92 2 Setting

93 This paper considers a many-to-one matching market  $\mathcal{M} = (\mathcal{K}, \mathcal{J}, \mathcal{P})$ , where  $\mathcal{K} = [K]$ ,  $\mathcal{J} = [N]$   
 94 are a finite arm set and a finite agent set, respectively. And each arm  $k$  has a capacity  $q_k \geq 1$ . To  
 95 guarantee that no agents will be unmatched, we focus on the market with  $N \leq \sum_{i=1}^K q_i$ .  $\mathcal{P}$  is the  
 96 fixed preference order of agents and arms, which is ranked by the mean reward. We assume that arm  
 97 preferences for agents are unknown and needed to be learned. If agent  $j$  prefers arm  $k$  over  $k'$ , which  
 98 also means that  $\mu_{j,k} > \mu_{j,k'}$ , we denote by  $k \succ_j k'$ . And the preference is strict that  $\mu_{j,k} \neq \mu_{j,k'}$  if  
 99  $k \neq k'$ . Similarly, each arm  $k$  has a fixed and known preference  $\succ_k$  over all agents, and specially,  
 100  $j \succ_k j'$  means that arm  $k$  prefers agent  $j$  over  $j'$ . Throughout, we focus on the market where all  
 101 agent-arm pairs are *mutually acceptable*, that is,  $j \succ_k \emptyset$  and  $k \succ_j \emptyset$  for all  $k \in [K]$  and  $j \in [N]$ .

102 Let mapping  $m$  be the matching result.  $m_t(j)$  is the matched arm for agent  $j$  at time  $t$ , and  $\gamma_t(k)$  is  
 103 the agents set matched with arm  $k$ <sup>1</sup>. Every time agent  $j$  selects an arm  $I_t(j)$ , and we use  $M_t(j)$  to  
 104 denote whether  $j$  is successfully matched with its selected arm.  $M_t(j) = 1$  if agent  $j$  is matched with  
 105  $I_t(j)$ , and  $M_t(j) = 0$ , otherwise. If multiple agents select arm  $k$  at the same time, only top  $q_k$  agents  
 106 can successfully match. The agent  $j$  matched with arm  $k$  can observe the reward  $X_{j,m_t(j)}(t)$ , where  
 107 the random reward  $X_{j,k}(t) \in [0, 1]$  is independently drawn from a fixed distribution with mean  $\mu_{j,k}$ .  
 108 While the unmatched ones have collisions and receive zero reward. Generally, the reward obtained by  
 109 agent  $j$  is  $X_{j,I_t(j)}(t) M_t(j)$ .

110 An agent  $j$  and an arm  $k$  form a *blocking pair* for a matching  $m$  if they are not matched but prefer  
 111 each other over their assignments, i.e.  $k \succ_j m(j)$  and  $\exists j' \in \gamma(k), j \succ_k j'$ . We say a matching  
 112 satisfies individually rationality (IR), if  $a_j \succ_{p_i} \emptyset$  and  $p_i \succ_{a_j} \emptyset$  for all  $i \in [N]$  and  $j \in [K]$ , that is,  
 113 every worker prefers to find a job rather than do nothing, and every company also wants to recruit  
 114 workers rather than not recruit anyone. Under the IR condition, a matching in the many-to-one setting  
 115 is *stable* if there does not exist a blocking pair [33, 35].

116 This paper considers the matching markets under the uniqueness condition. Thus the overall goal is  
 117 to find the unique stable matching between the agent side and arm side through iterations. Let  $m^*(j)$   
 118 be the stable matched arm for agent  $j$  under the stable matching  $m^*$ . The reward obtained by agent  $j$   
 119 is compared against the reward received by matching with  $m^*(j)$  at each time. We aim to minimize  
 120 the expected stable regret for agent  $j$  over time horizon  $T$ , which is defined as

$$R_j(T) = T\mu_{j,m^*(j)} - \mathbb{E} \left[ \sum_{t=1}^T M_t(j) X_{j,I_t(j)}(t) \right].$$

## 121 3 Algorithm

122 In this section, we introduce our MO-UCB-D4 Algorithm (Many-to-one UCB with Decentralized  
 123 Dominated arms Deletion and Local Deletion Algorithm) (Algorithm 1) for the decentralized many-  
 124 to-one market, where there is no platform to arrange actions for agents, which leads to conflicts  
 125 among agents. The MO-UCB-D4 algorithm for each agent  $j$  first takes agent set  $\mathcal{J}$  and arm set  $\mathcal{K}$  as  
 126 input and chooses a parameter  $\theta \in (0, 1/K)$  (discussed in Section C). It sets multiple phases, and  
 127 each phase  $i$  mainly includes regret minimization block (line 6 - 12) and communication block (line  
 128 13 - 16) with duration  $2^{i-1}, i = 1, 2, \dots$ .

129 For each agent  $j$  in phase  $i$ , the algorithm adds arm deletion to reduce potential conflicts, which  
 130 mainly contains global deletion and local deletion. The former eliminates the arms most preferred  
 131 by agents who rank higher than agent  $j$  and obtain active set  $\text{Ch}_j[i]$  (line 4), and the latter deletes  
 132 the arms that still have many conflicts with agent  $j$  after global deletion (line 6). We set a collision  
 133 counter  $C_{j,k}[i]$  to record the number of collisions for agent  $j$  pulling arm  $k$ .

134 In regret minimization block of phase  $i$ , we use  $L_j[i] = \{k : C_{j,k}[i] \geq \lceil \theta 2^i \rceil\}$  to represent the  
 135 arms that collide more times than a threshold  $\lceil \theta 2^i \rceil$  when matching with agent  $j$ . Arms in  $L_j[i]$  are  
 136 first locally deleted to reduce potential collisions for agent  $j$  (line 6). After that, agent  $j$  selects an  
 137 optimal action  $I_t(j)$  from remaining arms in  $\text{Ch}_j[i] \setminus L_j[i]$  in phase  $i$  according to UCB index, which is  
 138 computed by  $\hat{\mu}_{j,k}(t-1) + \sqrt{\frac{2\alpha \log(t)}{N_{j,k}(t-1)}}$  (line 7), where  $N_{j,k}(t-1)$  is the number that agent  $j$  and arm

<sup>1</sup>The mapping  $m$  is not reversible as it is not a injective, thus we do not use  $m_t^{-1}(k)$ .

---

**Algorithm 1** MO-UCB-D4 algorithm (for agent  $j$ )

---

**Input:**

$\theta \in (0, 1/K), \alpha > 1.$   
1: Set global dominated set  $G_j[0] = \phi$   
2: **for** phase  $i = 1, 2, \dots$  **do**  
3:   Reset the collision set  $C_{j,k}[i] = 0, \forall k \in [K]$ ;  
4:   Reset active arms set  $\text{Ch}_j[i] = [K] \setminus G_j[i-1]$ ;  
5:   **if**  $t < 2^i + NK(i-1)$  **then**  
6:     Local deletion  $L_j[i] = \{k : C_{j,k}[i] \geq \lceil \theta 2^i \rceil\}$ ;  
7:     Play arm  $I_t(j) \in \arg \max_{k \in \text{Ch}_j[i] \setminus L_j[i]} \left( \hat{\mu}_{j,k}(t-1) + \sqrt{\frac{2\alpha \log(t)}{N_{j,k}(t-1)}} \right)$ ;  
8:     **if**  $k = I_t(j)$  is successfully matched with agent  $j$ , i.e.  $m_t(j) = k$  **then**  
9:       Update estimate  $\hat{\mu}_{j,k}(t)$  and matching count  $N_{j,k}(t)$ ;  
10:     **else**  
11:        $C_{j,k}[i] = C_{j,k}[i] + 1$ ;  
12:     **end if**  
13:   **else if**  $t = 2^i + NK(i-1)$  **then**  
14:      $\mathcal{O}_j[i] \leftarrow$  most matched arm in phase  $i$ ;  
15:      $G_j[i] \leftarrow \text{COMMUNICATION}(i, \mathcal{O}_j[i])$ ;  
16:   **end if**  
17: **end for**

---

139  $k$  have been matched at time  $t-1$ . If the selected arm is successfully matched with agent  $j$ , then the  
140 algorithm updates estimated reward  $\hat{\mu}_{j,k}(t) = \frac{1}{N_{j,k}(t)} \sum_{s=1}^t 1\{I_s(j) = k \text{ and } M_s(j) = 1\} X_{j,k}(t)$   
141 and  $N_{j,k}(t)$  (line 9). Otherwise, the collision happens (line 11) and  $j$  receives zero reward. The  
142 regret minimization block identifies the most played arm  $\mathcal{O}_j[i]$  for agent  $j$  in each phase  $i$ , which is  
143 estimated as the best arm for  $j$ , thus making optimal policy to minimize expected regret.

---

**Algorithm 2** COMMUNICATION

---

**Input:**

Phase number  $i$ , and most played arms  $\mathcal{O}_j[i]$  for agent  $j, \forall j \in [N]$ .  
1: Set  $\mathcal{C} = \emptyset$ ;  
2: **for**  $t = 1, 2, \dots, NK-1$  **do**  
3:   **if**  $K(j-1) \leq t \leq Kj-1$  **then**  
4:     Agent  $j$  plays arm  $I_t(j) = (t \bmod K) + 1$ ;  
5:     **if** Collision Occurs **then**  
6:        $\mathcal{C} = \mathcal{C} \cup \{I_t(j)\}$ ;  
7:     **end if**  
8:   **else**  
9:     Play arm  $I_t(j) = \mathcal{O}_j[i]$ ;  
10:   **end if**  
11: **end for**  
12: RETURN  $\mathcal{C}$ ;

---

144 In the communication block (Algorithm 2), there are  $N$  sub-blocks, each with duration  $K$ . In the  
145  $\ell - th$  sub-block, only agent  $\ell$  pulls arm 1, arm 2,  $\dots$ , arm  $K$  in round-robin while the other agents  
146 select their most preferred arms estimated as the most played ones (line 4). This block aims to detect  
147 globally dominated arms for agent  $j$ :  $G_j[i] \subset \{\mathcal{O}_{j'}[i] : j' \succ_{\mathcal{O}_{j'}[i]} j\}$ . Under stable matching  $m^*$ , the  
148 globally dominated arms set for agent  $j$  is denoted as  $G_j^*$ . After the communication block in phase  
149  $i$ , each agent  $j$  updates its active arms set  $\text{Ch}_j[i+1]$  for phase  $i+1$ , by globally deleting arms set  
150  $G_j[i]$ , and enters into the next phase (line 4 in Algorithm 1).

151 Hence, multi-phases setting can guarantee that the active set in different phases has no inclusion  
152 relationship so that if an agent deletes an arm in a certain phase, this arm can still be selected in the  
153 later rounds. This ensures that each agent will not permanently eliminate its stable matched arm, and  
154 when the agent mistakenly deletes an arm, it will not lead to linear regret.

## 4 Results

### 4.1 Uniqueness Conditions

#### 4.1.1 $\tilde{\alpha}$ -condition

Constructing a unique stable matching plays an important role in market equilibrium and fairness [10, 15]. With uniqueness, there would be no dispute about adopting stable matching preferred by which side, thus it is more fair. When the preferences of agents and arms are given by some utility functions instead of random preferences, like the payments for workers in the labor markets, the stable matching is usually unique. Thus the assumption of the unique stable matching is quite common in real applications. In this section, we propose a new uniqueness condition,  $\tilde{\alpha}$ -condition. First, we introduce *uniqueness consistency (Unqc)* [19], which guarantees robustness and uniqueness of markets.

**Definition 1.** *A preference profile satisfies uniqueness consistency if and only if*

- (i) *there exists a unique stable matching  $m^*$ ;*
- (ii) *for any subset of arms or agents, the restriction of the preference profile on this subset with their stable-matched pair has a unique stable matching.*

It guarantees that even if an arbitrary subset of agents are deleted out of the system with their respective stable matched arms, there still exists a unique stable matching among the remaining agents and arms. This condition allows any algorithm to identify at least one stable pair in a unique stable matching system and guides the system to a global unique stable matching in an iterative manner. To obtain consistent stable results in the many-to-one market, we propose a new  $\tilde{\alpha}$ -condition, which is a sufficient and necessary condition for Unqc (proved in Appendix B).

We consider a finite set of arms  $[K] = \{1, 2, \dots, K\}$  and a finite set of agents  $[N] = \{1, 2, \dots, N\}$  with preference profile  $\mathcal{P}$ . Assume that  $[N]_r = \{A_1, A_2, \dots, A_N\}$  is a permutation of  $\{1, 2, \dots, N\}$  and  $[K]_r = \{c_1, c_2, \dots, c_K\}$  is a permutation of  $\{1, 2, \dots, K\}$ . Denote  $[N]$ ,  $[K]$  as the left order and  $[N]_r$ ,  $[K]_r$  as the right order. The  $k$ -th arm in the right order set  $[K]_r$  has the index  $c_k$  in the left order set  $[K]$  and the  $j$ -th agent in the right order set  $[N]_r$  has the index  $A_j$  in the left order set  $[N]$ . Considering arm capacity, we denote  $\gamma^*(c_k)$  (right order) as the stable matched agents set for arm  $c_k$ .

**Definition 2.** *A many-to-one matching market satisfies the  $\tilde{\alpha}$ -condition if,*

- (i) *The left order of agents and arms satisfies*

$$\forall j \in [N], \forall k > j, k \in [K], \mu_{j, m^*(j)} > \mu_{j, k},$$

where  $m^*(j)$  is agent  $j$ 's stable matched arm;

- (ii) *The right order of agents and arms satisfies*

$$\forall k < k' \leq K, c_k \in [K]_r, A_{k'} \subset [N]_r, \gamma^*(c_k) \succ_{c_k} A_{\sum_{i=1}^{k'-1} q_{c_i} + 1},$$

where the set  $\gamma^*(c_k)$  is more preferred than  $A_{\sum_{i=1}^{k'-1} q_{c_i} + 1}$  means that the least preferred agent in

$\gamma^*(c_k)$  for  $c_k$  is better than  $A_{\sum_{i=1}^{k'-1} q_{c_i} + 1}$  for  $c_k$ .

Under our  $\tilde{\alpha}$ -condition, the left order and the right order satisfy the following rule. The left order gives rankings according to agents' preferences. The first agent in the left order set  $[N]$  prefers arm 1 in  $[K]$  most and has it as the stable matched arm. Similar properties for the agent 2 to  $q_1$  since arm 1 has  $q_1$  capacity. Then the  $(q_1 + 1)$ -th agent in the left order set  $[N]$  has arm 2 in  $[K]$  as her stable matched arm and prefers arm 2 most except arm 1. The remaining agents follow similarly. Similarly, the right order gives rankings according to arms' preferences. The first arm 1 in the right order set  $[K]_r$  most prefers first  $q_{c_1}$  agents in the right order set  $[N]_r$  and takes them as its stable matched agents. The remaining arms follow similarly.

This condition is more general than existing uniqueness conditions like *SPC* [28] and can recover the known  $\alpha$ -condition in one-to-one matching market [19]. The relationship between the existing uniqueness conditions and our proposed conditions will be analyzed in detail later in Section 4.1.2.

The main idea from one-to-one to many-to-one analysis is to replace individuals with sets. In general, under  $\tilde{\alpha}$ -condition, the left order satisfies that when arm 1 to arm  $k - 1$  are removed, agents

199  $(\sum_{i=1}^{k-1} q_i + 1)$  to  $(\sum_{i=1}^k q_i)$  prefer  $k$  most, and the right order means that when  $A_1$  to agents  
 200  $A_{\sum_{i=1}^{k-1} q_i}$  are removed, arm  $k$  prefers agents  $\mathcal{A}_k = \{A_{\sum_{i=1}^{k-1} q_i + 1}, A_{\sum_{i=1}^{k-1} q_i + 2}, \dots, A_{\sum_{i=1}^k q_i}\}$ ,  
 201 where  $\mathcal{A}_k$  is the agent set that are most  $q_k$  preferred by arm  $k$  among those who have not been  
 202 matched by arm  $1, 2, \dots, k-1$ . The next theorem give a summary.

203 **Theorem 1.** *If a market  $\mathcal{M} = (\mathcal{K}, \mathcal{J}, \mathcal{P})$  satisfies  $\tilde{\alpha}$ -condition, then  $m^*(\sum_{i=1}^{j-1} q_i + 1) =$   
 204  $m^*(\sum_{i=1}^{j-1} q_i + 2) = \dots = m^*(\sum_{i=1}^j q_i) = j$  (the left order),  $\gamma^*(c_k) = \mathcal{A}_k$  and  $m^*(\mathcal{A}_j) = c_j$  (the  
 205 right order) under stable matching.*

206 Under  $\tilde{\alpha}$ -condition, the stable matched arm may not be the most preferred one for each agent  $j$ ,  
 207  $j \in [N]$ , thus (i) we do not have  $m^*(j)$  to be dominated only by the agent 1 to agent  $j-1$ , i.e. there  
 208 may exist  $j' > j$ , s.t.  $j' \succ_{m^*(j)} j$ ; (ii) the left order may not be identical to the right order, we  
 209 define a mapping  $lr$  to match the index of an agent in the left order with the index in the right order,  
 210 i.e.  $A_{lr(j)} = j$ . From Theorem 1, the stable matched set for arm  $k$  is its first  $q_k$  preferred agents  
 211  $\gamma^*(c_k) = \mathcal{A}_k$ . We define  $lr$  as  $lr(i) = \max\{j : A_j \in \gamma^*(m^*(i)), j \in [N]\}$ , that is, in the right  
 212 order, the mapping for arm  $k \in [K]$  is the least preferred one among its most  $q_k$  preferred agents.  
 213 Note that this mapping is not an injective, i.e.  $\exists j, j'$ , s.t. agent  $j = A_{lr(j)} = A_{lr(j')}$ . An intuitive  
 214 representation can be seen in Figure 4 in Appendix A.1.

#### 215 4.1.2 Unique Stable Conditions in Many-to-one Matching

216 Uniqueness consistency (Unqc) leads the stable matching to a robust one which is a desirable property  
 217 in large dynamic markets with constant individual departure [7]. A precondition of Unqc is to ensure  
 218 global unique stability, hence finding uniqueness conditions is essential.

219 The existing unique stable conditions are well established in one-to-one setting (analysis can be  
 220 found in Appendix B), and in this section, we focus on uniqueness conditions in many-to-one market,  
 221 such as *SPC*, [28], *Aligned Preference*, *Serial Dictatorship Top-top match* and *Acyclicity* [26, 2, 28]  
 222 (Definition 9, 7, 8, 10 in Appendix B.2). Takashi Akahoshi [2] proposes a necessary and sufficient  
 223 condition for uniqueness of stable matching in many-to-one matching where unacceptable agents  
 224 and arms may exist on both sides. We denote their condition as *Acyclicity\**. Under our setting, both  
 225 two sides are acceptable, and we first give the proof of that *Acyclicity\** is a necessary and sufficient  
 226 condition for uniqueness in this setting (see Section B.2.4 in Appendix B). We then give relationships  
 227 between our newly  $\tilde{\alpha}$ -condition and other existing uniqueness conditions, intuitively expressed in  
 228 Figure 1, and we give proof for this section in Appendix B.2.

229 **Lemma 1.** *In a many-to-one matching market  $\mathcal{M} = (\mathcal{K}, \mathcal{J}, \mathcal{P})$ , both *Serial Dictatorship* and *Aligned*  
 230 *Preference* can produce a unique stable matching and they are equivalent.*

231 **Theorem 2.** *In a many-to-one matching market  $\mathcal{M} = (\mathcal{K}, \mathcal{J}, \mathcal{P})$ , our  $\tilde{\alpha}$ -condition satisfies:*

- 232 (i) *SPC* is a sufficient condition to  $\tilde{\alpha}$ -condition;
- 233 (ii)  $\tilde{\alpha}$ -condition is a necessary and sufficient condition to Unqc;
- 234 (iii)  $\tilde{\alpha}$ -condition is a sufficient condition to *Acyclicity\**.

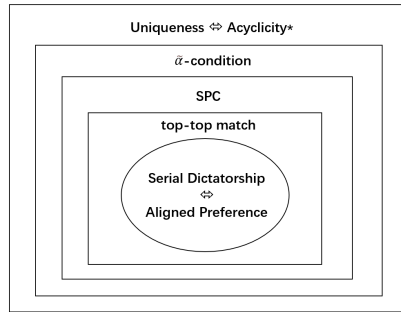

Figure 1: Relations of Uniqueness Conditions in Many-to-one Market.

## 235 4.2 Theoretical Results of Regret

236 We then provide theoretical results of MO-UCB-D4 algorithm under our  $\tilde{\alpha}$ -condition. Recall that  $G_j^*$   
 237 is the globally dominated arms for agent  $j$  under stable matching  $m^*$ . For each arm  $k \notin G_j^*$ , we give  
 238 the definition of the *blocking agents* for arm  $k$  and agent  $j$ :  $\mathcal{B}_{jk} = \{j' : j' \succ_k j, k \notin G_{j'}^*\}$ , which  
 239 contains agents more preferred by arm  $k$  than  $j$ . The *hidden arms* for agent  $j$  is  $\mathcal{H}_j = \{k : k \notin$   
 240  $G_j^*\} \cap \{k : \mathcal{B}_{jk} \neq \emptyset\}$ . The reward gap for agent  $j$  and arm  $k$  is defined as  $\Delta_{jk} = |\mu_{j,m^*(j)} - \mu_{j,k}|$   
 241 and the minimum reward gap across all arms and agents is  $\Delta = \min_{j \in [N]} \{\min_{k \in [K]} \Delta_{j,k}\}$ . We  
 242 assume that the reward is different for each agent, thus  $\Delta_{j,k} > 0$  for every agent  $j$  and arm  $k$ .

243 **Theorem 3.** (Regret upper bound) Let  $J_{\max}(j) = \max\{j+1, \{j' : \exists k \in \mathcal{H}_j, j' \in \mathcal{B}_{jk}\}\}$  be the  
 244 max blocking agent for agent  $j$  and  $f_{\tilde{\alpha}}(j) = j + l_{r_{\max}}(j)$  is a fixed factor depends on both the left  
 245 order and the right order for agent  $j$ . Following MO-UCB-D4 algorithm with horizon  $T$ , the expected  
 246 regret of a stable matching under  $\tilde{\alpha}$ -condition (Definition 2) for agent  $j \in [N]$  is upper bounded by

$$\begin{aligned} \mathbb{E}[R_j(T)] \leq & \sum_{k \notin G_j^* \cup m^*(j)} \frac{8\alpha}{\Delta_{jk}} \left( \log(T) + \sqrt{\frac{\pi}{\alpha} \log(T)} \right) + \sum_{k \notin G_j^*} \sum_{j' \in \mathcal{B}_{jk} : k \notin G_{j'}^*} \frac{8\alpha \mu_{j,m^*(j)}}{\Delta_{j'k}^2} \left( \log(T) + \sqrt{\frac{\pi}{\alpha} \log(T)} \right) \\ & + c_j \log_2(T) + O\left( \frac{N^2 K^2}{\Delta^2} + (\min(1, \theta|\mathcal{H}_j|) f_{\alpha}(J_{\max}(j)) + f_{\tilde{\alpha}}(j) - 1) 2^{i^*} + N^2 K i^* \right), \end{aligned}$$

247 where  $i^* = \max\{8, i_1, i_2\}$  (then  $i^* \leq 8$  and  $i_1, i_2$  are defined in equation (3)), and  $l_{r_{\max}}(j) =$   
 248  $\max\{l_r(j') : 1 \leq j' \leq j\}$ , is the maximum right order mapping for agent  $j'$  who ranks higher than  
 249  $j$ .

250 From Theorem 3, the scale of the regret upper bound under  $\tilde{\alpha}$ -condition is  $O\left(\frac{NK \log(T)}{\Delta^2}\right)$  and the  
 251 proof is in Section 3.

252 **Proof Sketch of Theorem 3.** Under  $\tilde{\alpha}$ -condition, we only need to discuss the regret of the unique  
 253 result. We construct a *good phase* (in Appendix A.2) and denote that the time point of agent  $j$   
 254 reaching its *good phase* by  $\tau_j$ . After  $\tau_j$ , agent  $j$  could identify its best arm and matches with his  
 255 stable pair. Thus, from phase  $\tau_j$  on-wards, agent  $j+1$  will find the set of globally dominated arms  
 256  $G_{j+1}^*$  and will eliminate arm  $m^*(j)$  if  $m^*(j)$  brings collisions in communication block according  
 257 to Algorithm 1. Global deletion here follows the left order. Then when agent  $j$  enters into regret  
 258 minimization block next phase, the times it plays a sub-optimal arm is small which leads to a small  
 259 total number of collisions experienced by agent  $j+1$ . Then the process of each agent after *good*  
 260 *phase* is divided into two stages: before  $\tau_j$  and after  $\tau_j$ . After  $\tau_j$ , according to the causes of regret, it  
 261 is divided into four blocks: collision, local deletion, communication, and sub-optimal play. Phases  
 262 before  $\tau_j$  can be bounded by induction. The regret decomposition is bound by the following.

263 **Lemma 2.** (Regret Decomposition) For a stable matching under  $\tilde{\alpha}$ -condition, the upper bound of  
 264 regret for the agent  $j \in [N]$  under our algorithm can be decomposed by:

$$\begin{aligned} \mathbb{E}[R_j(T)] \leq & \underbrace{\mathbb{E}[S_{F_{\alpha j}}]}_{(\text{Regret before phase } F_{\alpha j})} + \underbrace{\min(\theta|\mathcal{H}_j|, 1) \mathbb{E}[S_{V_{\alpha j}}]}_{(\text{Local deletion})} + \underbrace{((K-1 + |\mathcal{B}_{j,m^*(j)}|) \log_2(T) + NK \mathbb{E}[V_{\alpha j}])}_{(\text{Communication})} \\ & + \underbrace{\sum_{k \notin G_j^*} \sum_{j' \in \mathcal{B}_{jk} : k \notin G_{j'}^*} \frac{8\alpha \mu_{j,m^*(j)}}{\Delta_{j'k}^2} \left( \log(T) + \sqrt{\frac{\pi}{\alpha} \log(T)} \right)}_{(\text{Collision})} \\ & + \underbrace{\sum_{k \notin G_j^* \cup m^*(j)} \frac{8\alpha}{\Delta_{jk}} (\log(T) + \sqrt{\frac{\pi}{\alpha} \log(T)}) + NK \left( 1 + (\phi(\alpha) + 1) \frac{8\alpha}{\Delta^2} \right)}_{(\text{Sub-optimal play})}, \end{aligned}$$

265 where  $F_{\alpha j}, V_{\alpha j}$  are the time points when agent  $j$  enters into  $\tilde{\alpha}$ -Good phase and  $\tilde{\alpha}$ -Low Collision  
 266 phase respectively, mentioned as "good phase" above, are defined in Appendix A.2.

## 5 Difficulties and Solutions

While putting forward our  $\tilde{\alpha}$ -condition in the many-to-one setting, many new problems need to be taken into account.

**From one-to-one setting to many-to-one setting** First, although we assume that arm preference is over individuals rather than combination of agents, the agents matched by one arm are not independent. Specially, arms with capacity  $q$  can not just be replaced by  $q$  independent individuals with the same preference. Since there would be implicit competition among different replicates of this arm, and it can reject the previously accepted agents when it faces a more preferred agent. Secondly, collisions among agents is one of main causes of regret in decentralized setting, while capacity will hinder the collision-reducing process. In communication block, when two agents select one arm at a time, as an arm can accept more than one agent, these two cannot distinguish who is more preferred by this arm, while it can be done in one-to-one markets. Thus it is more difficult to identify arm preferences for each agent. The  $lr$  in [7] is a one-to-one mapping that corresponds the agent index in the left order and the agent index in the right order, which is related to regret bound (Theorem 3 in [7] and Theorem 3 in our work). While it does not hold in our setting. To give a descriptive range of matched result for each arm under  $\tilde{\alpha}$ -condition, we need to define a new mapping.

In order to solve these problems, we explain as follows: First, since capacity influence the communication among agents, we add communication block and introduce an arm set  $G_j^*$ , which will be deleted before each phase to reduce collisions, where  $G_j^*$  contains arms that will block agent  $j$  globally under stable matching  $m^*$ . Second, the idea from one-to-one to many-to-one is a transition from individual to set. It is natural to split sets into individuals or design a bridge to correspond sets to individuals. We construct a new mapping  $lr$  (Figure 4 in Appendix A) from agent  $j$  in the left order to agents in the right order under  $\tilde{\alpha}$ -condition.  $lr$  maps each arm  $k$  to the least preferred one of its stable matched agents in the right order, thus giving a matching between individuals and individuals and constructing the range of the stable matched agents set (Theorem 1). Except  $lr$ , capacity also influences regret mainly in communication block, as mentioned in the first paragraph.

**From  $\alpha$ -condition to  $\tilde{\alpha}$ -condition** To extend  $\alpha$ -condition to the many-to-one setting, it needs to define preferences among sets. However, there might be exponential number of sets due to the combinatorial structure and simply constraining preferences over all possible sets will lead to high complexity. Motivated by  $\alpha$ -condition which characterizes properties of matched pairs in one-to-one setting, we come up with a possible constraint by regarding the arm and its least preferred agent in the matched set as the *matched pair* and define preferences according to this grouping. It turns out that we only need to define the preferences of arms over disjoint sets of agents to complete the extension as  $\alpha$ -condition is defined under the stable matching, which can also fit the regret analysis well. As a summary, there might be other possible ways to extend the  $\alpha$ -condition but we present a successful trial to not only give a good extension with similar inclusion relationships but also guarantee good regret bound.

## 6 Experiments

In this section, we verify the experimental results of our MO-UCB-D4 algorithm (Algorithm 1) for decentralized many-to-one matching markets. For all experiments, the rankings of all agents and arms are sampled uniformly. We set the reward value towards the least preferred arm to be  $1/N$  and the most preferred one as 1 for each agent, then the reward gap between any adjacently ranked arms is  $\Delta = 1/N$ . The reward for agent  $j$  matches with arm  $k$  at time  $t$   $X_{j,k}(t)$  is sampled from  $\text{Ber}(\mu_{j,k})$ . The capacity is equally set as  $q = N/K$ . We investigate how the cumulative regret and cumulative market unstability depend on the size of the market and the number of arms under three different unique stability conditions: *Serial Dictatorship*, *SPC*,  $\tilde{\alpha}$ -condition. The former cumulative regret is the total mean reward gap between the stable matching result and the simulated result, and the latter cumulative unstability is defined as the number of unstable matchings in round  $t$ . In our experiments, all results are averaged over 10 independent runs, hence the error bars are calculated as standard deviations divided by  $\sqrt{10}$ .

**Varying the market size** To test effects on two indicators, cumulative regret and cumulative unstability, we first varying  $N$  with fixed  $K$  with market size of  $N \in \{10, 20, 30, 40\}$  agents



and  $K = 5$  arms. The number of rounds is set to be 100,000. The cumulative regret in Figure 2(a)(c)(e) show an increasing trend with convergence as the number of agents increases under these three conditions. When the number of agents increases, there is a high probability of collisions among different agents, resulting in the increase of cumulative regret. Similar results for cumulative instability are shown in Figure 2(b)(d)(f). When  $N$  is larger, the number of unstable pairs becomes more. With the increase of the number of rounds, both two indicators increase first and then tend to be stable. The jumping points are caused by multi-phases setting of MO-UCB-D4 algorithm.

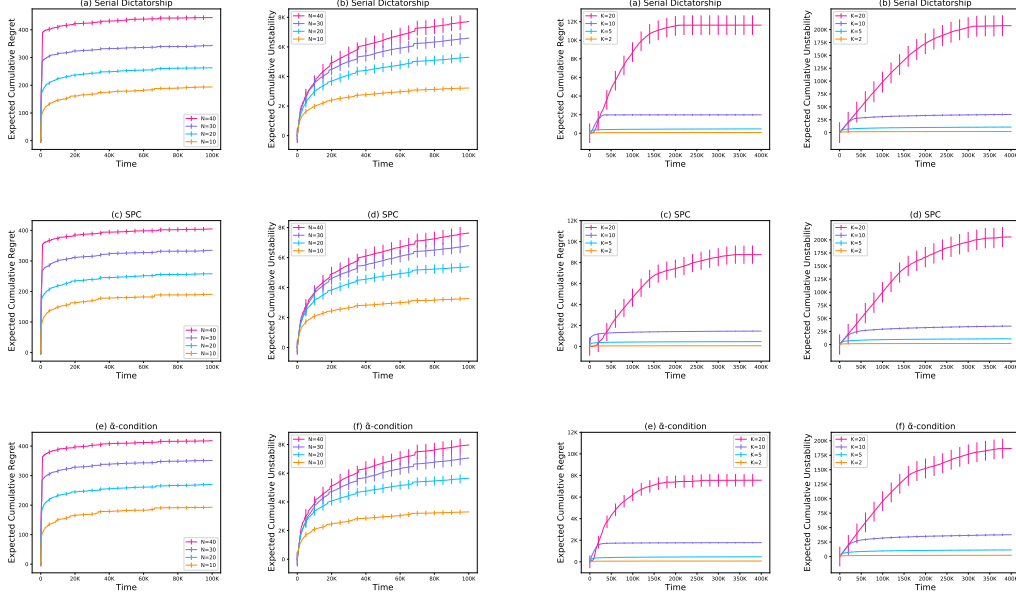

Figure 2: Cumulative regret and cumulative instability of MO-UCB-D4 of size with  $N \in \{10, 20, 30, 40\}$  and the number of arms  $K = 5$  under *Serial Dictatorship*, *SPC*,  $\tilde{\alpha}$ -condition.

Figure 3: Cumulative regret and cumulative instability of MO-UCB-D4 of size with  $K \in \{2, 5, 10, 20\}$  under *Serial Dictatorship*, *SPC*,  $\tilde{\alpha}$ -condition.

**Varying arm capacity** The number of arms  $K$  is chosen by  $K \in \{2, 5, 10, 20\}$ , with  $N = 20$  and  $q = N/K$ . The number of rounds we set is 400,000. With the increase of  $K$ , both the cumulative regret in Figure 3(a)(c)(e) and the cumulative instability in Figure 3(b)(d)(f) increase monotonously. When  $K$  increases, the capacity  $q_k$  for each arm  $k$  decreases, and then the number of collisions will increase, which leads to an increase of cumulative regret. And it also leads to more unstable pairs, which needs more communication blocks to converge to a stable matching. Under these three conditions, the performances of the algorithm are similar.

## 7 Conclusion

We are the first to study the bandit algorithm for the many-to-one matching market under the unique stable matching. This work focuses on a decentralized market. A new  $\tilde{\alpha}$ -condition is proposed to guarantee a unique stable outcome in many-to-one market, which is more general than existing uniqueness conditions like *SPC*, *Serial Dictatorship* and could recover the usual  $\alpha$ -condition in one-to-one setting. We propose a phase-based algorithm of MO-UCB-D4 with arm-elimination, which obtains  $O\left(\frac{NK \log(T)}{\Delta^2}\right)$  stable regret under  $\tilde{\alpha}$ -condition. By carefully defining a mapping from arms to the least preferred agent in its stable matched set, we could effectively correspond arms and agents by individual-to-individual. A series of experiments under two environments of varying the market size and varying arm capacity are conducted. The results show that our algorithm performs well under *Serial Dictatorship*, *SPC* and  $\tilde{\alpha}$ -condition respectively.

## References

- [1] Azar Abizada. Stability and incentives for college admissions with budget constraints. *Theoretical Economics*, 11(2):735–756, 2016.
- [2] Takashi Akahoshi. Singleton core in many-to-one matching problems. *Mathematical Social Sciences*, 72:7–13, 2014.
- [3] Ahmet Altinok. Dynamic many-to-one matching. *Available at SSRN 3526522*, 2019.
- [4] Peter Auer, Nicolo Cesa-Bianchi, and Paul Fischer. Finite-time analysis of the multiarmed bandit problem. *Machine learning*, 47(2):235–256, 2002.
- [5] Orly Avner and Shie Mannor. Concurrent bandits and cognitive radio networks. In *Joint European Conference on Machine Learning and Knowledge Discovery in Databases*, pages 66–81. Springer, 2014.
- [6] Sophie Bade. Random serial dictatorship: the one and only. *Mathematics of Operations Research*, 45(1):353–368, 2020.
- [7] Soumya Basu, Karthik Abinav Sankararaman, and Abishek Sankararaman. Beyond  $\log^2(t)$  regret for decentralized bandits in matching markets. In *International Conference on Machine Learning*, pages 705–715, 2021.
- [8] Anna Bogomolnaia and Hervé Moulin. A new solution to the random assignment problem. *Journal of Economic theory*, 100(2):295–328, 2001.
- [9] Somouaoga Bonkougou. Decentralized college admissions under single application. *Review of Economic Design*, 25(1):65–91, 2021.
- [10] Simon Clark. The uniqueness of stable matchings. *Contributions in Theoretical Economics*, 6(1), 2006.
- [11] Jan Eeckhout. On the uniqueness of stable marriage matchings. *Economics Letters*, 69(1):1–8, 2000.
- [12] David Gale and Lloyd S Shapley. College admissions and the stability of marriage. *The American Mathematical Monthly*, 69(1):9–15, 1962.
- [13] Aurélien Garivier, Tor Lattimore, and Emilie Kaufmann. On explore-then-commit strategies. *Advances in Neural Information Processing Systems*, 29:784–792, 2016.
- [14] Virginia Gunn, Bertina Kreshpaj, Nuria Matilla-Santander, Emilia F Vignola, David H Wegman, Christer Hogstedt, Emily Q Ahonen, Theo Bodin, Cecilia Orellana, Sherry Baron, et al. Initiatives addressing precarious employment and its effects on workers’ health and well-being: A systematic review. *International Journal of Environmental Research and Public Health*, 19(4):2232, 2022.
- [15] Gregory Z Gutin, Philip R Neary, and Anders Yeo. Unique stable matchings. *arXiv preprint arXiv:2106.12977*, 2021.
- [16] Guillaume Haeringer and Flip Klijn. Constrained school choice. *Journal of Economic theory*, 144(5):1921–1947, 2009.
- [17] John William Hatfield, Fuhito Kojima, and Scott Duke Kominers. Investment incentives in labor market matching. *American Economic Review*, 104(5):436–41, 2014.
- [18] Ramesh Johari, Vijay Kamble, and Yash Kanoria. Matching while learning. *Operations Research*, 69(2):655–681, 2021.
- [19] Alexander Karpov. A necessary and sufficient condition for uniqueness consistency in the stable marriage matching problem. *Economics Letters*, 178:63–65, 2019.
- [20] Bettina Klaus and Flip Klijn. Local and global consistency properties for student placement. *Journal of Mathematical Economics*, 49(3):222–229, 2013.

- [21] Lydia T Liu, Horia Mania, and Michael Jordan. Competing bandits in matching markets. In *International Conference on Artificial Intelligence and Statistics*, pages 1618–1628. PMLR, 2020.
- [22] Lydia T Liu, Feng Ruan, Horia Mania, and Michael I Jordan. Bandit learning in decentralized matching markets. *arXiv preprint arXiv:2012.07348*, 2020.
- [23] Jinpeng Ma. The singleton core in the college admissions problem and its application to the national resident matching program (nrmp). *Games and Economic Behavior*, 69(1):150–164, 2010.
- [24] Onkar Malgonde, He Zhang, Balaji Padmanabhan, and Moez Limayem. Taming complexity in search matching: Two-sided recommender systems on digital platforms. *Mis Quarterly*, 44(1), 2020.
- [25] Hai Nguyen, Thành Nguyen, and Alexander Teytelboym. Stability in matching markets with complex constraints. *Management Science*, 67(12):7438–7454, 2021.
- [26] Muriel Niederle and Leeat Yariv. Decentralized matching with aligned preferences. Technical report, National Bureau of Economic Research, 2009.
- [27] Jaeok Park. Competitive equilibrium and singleton cores in generalized matching problems. *International Journal of Game Theory*, 46(2):487–509, 2017.
- [28] Philip J Reny. A simple sufficient condition for a unique and student-efficient stable matching in the college admissions problem. *Economic Theory Bulletin*, 9(1):7–9, 2021.
- [29] Antonio Romero-Medina and Matteo Triossi. Acyclicity and singleton cores in matching markets. *Economics Letters*, 118(1):237–239, 2013.
- [30] Jonathan Rosenski, Ohad Shamir, and Liran Szlak. Multi-player bandits—a musical chairs approach. In *International Conference on Machine Learning*, pages 155–163. PMLR, 2016.
- [31] Alvin E Roth. On the allocation of residents to rural hospitals: a general property of two-sided matching markets. *Econometrica: Journal of the Econometric Society*, pages 425–427, 1986.
- [32] Alvin E Roth and Marilda Sotomayor. Two-sided matching. *Handbook of game theory with economic applications*, 1:485–541, 1992.
- [33] Hannu Salonen and Mikko AA Salonen. Mutually best matches. *Mathematical Social Sciences*, 91:42–50, 2018.
- [34] Abishek Sankararaman, Soumya Basu, and Karthik Abinav Sankararaman. Dominate or delete: Decentralized competing bandits in serial dictatorship. In *International Conference on Artificial Intelligence and Statistics*, pages 1252–1260. PMLR, 2021.
- [35] Jay Sethuraman, Chung-Piaw Teo, Liwen Qian, et al. Many-to-one stable matching: Geometry and fairness. *Mathematics of Operations Research*, 31(3):581–596, 2006.
- [36] William R Thompson. On the likelihood that one unknown probability exceeds another in view of the evidence of two samples. *Biometrika*, 25(3/4):285–294, 1933.

## Checklist

1. For all authors...
  - (a) Do the main claims made in the abstract and introduction accurately reflect the paper’s contributions and scope? [\[Yes\]](#) Please see Abstract and Section 1.
  - (b) Did you describe the limitations of your work? [\[Yes\]](#) Please see Section C.4.
  - (c) Did you discuss any potential negative societal impacts of your work? [\[N/A\]](#) This work mainly focuses on the online learning theory, which does not have any potential negative societal impacts.

- 433 (d) Have you read the ethics review guidelines and ensured that your paper conforms to  
434 them? [Yes]
- 435 2. If you are including theoretical results...
- 436 (a) Did you state the full set of assumptions of all theoretical results? [Yes] Please see  
437 Section 2.
- 438 (b) Did you include complete proofs of all theoretical results? [Yes] Please see Appendix.
- 439 3. If you ran experiments...
- 440 (a) Did you include the code, data, and instructions needed to reproduce the main exper-  
441 imental results (either in the supplemental material or as a URL)? [Yes] Please see  
442 supplemental material.
- 443 (b) Did you specify all the training details (e.g., data splits, hyperparameters, how they  
444 were chosen)? [Yes] Please see Section 6 and supplemental material.
- 445 (c) Did you report error bars (e.g., with respect to the random seed after running experi-  
446 ments multiple times)? [Yes] Please see Section 6.
- 447 (d) Did you include the total amount of compute and the type of resources used (e.g., type  
448 of GPUs, internal cluster, or cloud provider)? [N/A]
- 449 4. If you are using existing assets (e.g., code, data, models) or curating/releasing new assets...
- 450 (a) If your work uses existing assets, did you cite the creators? [N/A]
- 451 (b) Did you mention the license of the assets? [N/A]
- 452 (c) Did you include any new assets either in the supplemental material or as a URL? [N/A]
- 453
- 454 (d) Did you discuss whether and how consent was obtained from people whose data you're  
455 using/curating? [N/A]
- 456 (e) Did you discuss whether the data you are using/curating contains personally identifiable  
457 information or offensive content? [N/A]
- 458 5. If you used crowdsourcing or conducted research with human subjects...
- 459 (a) Did you include the full text of instructions given to participants and screenshots, if  
460 applicable? [N/A]
- 461 (b) Did you describe any potential participant risks, with links to Institutional Review  
462 Board (IRB) approvals, if applicable? [N/A]
- 463 (c) Did you include the estimated hourly wage paid to participants and the total amount  
464 spent on participant compensation? [N/A]

## 465 A Analysis for Our $\tilde{\alpha}$ -Condition

### 466 A.1 Mapping under $\tilde{\alpha}$ -Condition

467 To connect two sides of the market, we define a mapping  $lr$  as  $lr(i) = \max\{j : A_j \in \gamma^*(m^*(i)), j \in [N]\}$ , from agent index in the left order to agent index in the right order under  $\tilde{\alpha}$ -condition since  
 468 arms in the right order can select more than one agents. From Theorem 1, the stable matching  
 469 for arm  $k$  is its first  $q_k$  preferred agents  $\gamma^*(c_k) = \mathcal{A}_k$ . Recall that the preference is strict. Denote  
 470 that the first  $q_k$  agents are ranked as  $\mathcal{A}_k^{(1)} \succ \mathcal{A}_k^{(2)} \succ \dots \mathcal{A}_k^{(q_k)}$ . Then the rule of the mapping  $lr$   
 471 in the right order we set is as follows: the mapping for arm  $k \in [K]$  is the least preferred one  
 472 among its most preferred  $q_k$  agents, that is,  $A_{lr(k)} = \mathcal{A}_k^{(q_k)}$ . And the intuitive representation can be  
 473 seen in Figure 4. If we assume that  $c_{i_2} = c_1$ , then the right order can be seen from the figure and  
 474  $lr(q_1 + 1) = \dots = lr(q_1 + q_{c_1}) = q_{c_1}$  holds.

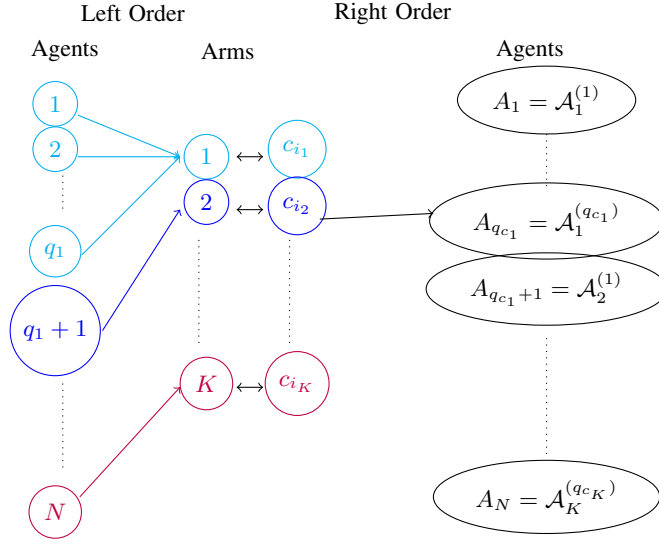

Figure 4: The mapping from the left order to the right order (assume that  $c_{i_2} = c_1$ )

### 476 A.2 Proof for Regret Analysis under $\tilde{\alpha}$ - Condition

477 We first give some notations and definitions:

478 **Rank for Each Agent** Recall that if arm  $k$  prefers agent  $j$  over  $j'$ , we denote  $j \succ_k j'$ . And  
 479 under  $\tilde{\alpha}$ -condition, the stable matched arm  $m^*(j)$  for agent  $j$  is agent  $j$ 's most preferred arm among  
 480 remaining arms who still have vacant seats within its capacity. Denote the agents that match with the  
 481 stable matched arm of agent  $j$  by  $\gamma^*(m^*(j))$ .

482 **Classification of arm sets** The dominated arms set  $\mathcal{D}_j = \{m^*(j') : j' \succ_{m^*(j')} j\}$  means the  
 483 stable matched arms of agents who are more preferred by these arms than agent  $j$ , and the globally  
 484 dominated arms set under stable matching  $m^*$  is  $G_j^*$ , a subset of  $\mathcal{D}_j$ . Global deletion here follows  
 485 the left order. Recall that  $\mathcal{O}_j[i]$  is the best arm for agent  $j$  in phase  $i$ . In Algorithm 1, the estimated  
 486 dominated arms set in phase  $i$  is  $\mathcal{D}_j[i] = \{\mathcal{O}_{j'}[i] : j' \succ_{\mathcal{O}_{j'}[i]} j\}$  and the globally dominated arms in  
 487 each phase  $i$   $G_j[i] \subset \mathcal{D}_j[i]^2$ . For each arm  $k \notin G_j^*$ , we give the definition of the blocking agents for  
 488 arm  $k$  and agent  $j$ :  $\mathcal{B}_{j,k} = \{j' : j' \succ_k j, k \notin G_{j'}^*\}$ , which contains agents more preferred by arm  $k$   
 489 than  $j$ . The hidden arms for agent  $j$  is  $\mathcal{H}_j = \{k : k \notin G_j^*\} \cap \{k : \mathcal{B}_{j,k} \neq \emptyset\}$ .

490 Under SPC condition, the stable matched pair is also the best arm for each agent, and agents that  
 491 arm  $k$  matches with is its  $q_k$  most preferred agents. It can be easily understood by the definition of  
 492 Top-top match. While under our  $\tilde{\alpha}$ -condition, the stable results may not the best choices for two sides.

<sup>2</sup>We can obtain  $\mathcal{D}_j[i] = G_j[i]$  in the one-to-one setting

We then define a set  $NTT(j)$ , in which each arm is a stable matched arm for some other agents  $\mathcal{A}_{j'}$ , is a sub-optimal arm for  $j$ , and  $j$  is preferred by that arm than its stable matched pairs  $\gamma^*(k)$ . The  $NTT(j)$  set can understood as "not *Top-top match*" stable results, and its mathematical expression is that

$$NTT(j) = \left\{ k : k \in [K], \mu_{j,k} < \mu_{j,m^*(j)}, \exists j' \notin \gamma^*(m^*(j)), s.t. \left( k = m^*(\mathcal{A}_{j'}) \text{ and } j \succ_k \gamma^*(k) \right) \right\},$$

where  $j \succ_k \gamma^*(k)$  means that  $k$  prefers  $j$  than any agents in  $\gamma^*(k)$ .

**Phases with Good Properties** In the decentralized market with limited information, estimating preferences of other agents is challenging, thus we set a communication block. This block for agent  $j$  is mainly to judge the dominated arms of agents that rank higher than  $j$ , where the dominated arm is measured as the arm with the most number of times matched with each agent. Under our  $\tilde{\alpha}$ -condition, the most preferred arm is not necessarily the stable matched result, hence if arms in  $NTT(j)$  match too many times with  $j$ , agents cannot distinguish the preference of agent  $j$ . During the time period with limitation of arms in the  $NTT(j)$ , other agents can better identify the preferences of  $j$ , which helps to reduce conflicts.

**Definition 3.** We say phase  $i$  is a **Warm-up Phase** for some  $j \in [N]$  under  $\tilde{\alpha}$ -condition if the following conditions hold for each arm  $k \in NTT(j)$ :

- (i) arm  $k$  is matched with agent  $j$  at most  $\frac{10\alpha i}{\Delta_{j,k}^2}$  in phase  $i$ , where  $\alpha$  is a parameter of UCB index (line 7 in Algorithm 1);
- (ii) arm  $k$  is not agent  $j$ 's most matched arm in phase  $i$ .

According to it, we introduce the *Unlocked phase* ( $U_j$ ) that all phases on and after it, agents  $A_1$  to  $A_j$  are all into warm-up phase. Let  $i_1 = \min \left\{ i : (N-1) \frac{10\alpha i}{\Delta^2} < \theta 2^{(i-1)} \right\}$ , where  $\Delta$  is the minimum reward gap, and

$$\mathbb{1}_W[i, j] = \begin{cases} 1, & \text{phase } i \text{ is a warm-up phase for agent } j; \\ 0, & \text{otherwise.} \end{cases}$$

$$U_j = \max \left( i_1, \min \left( \left\{ i : \prod_{j'=1}^{lr(j)-1} \prod_{i' \geq i} \mathbb{1}_W[i', A_{j'}] = 1 \right\} \cup \{\infty\} \right) \right).$$

**Definition 4.** We say phase  $i$  is a  $\tilde{\alpha}$ -**Good Phase** for some  $j \in [N]$  under  $\tilde{\alpha}$ -condition if the following are all satisfied:

- (i) The globally dominated arms for agent  $j$  are globally deleted in phase  $i$ . Then,  $G_j[i] = G_j^*$  holds.
- (ii) The phase  $i$  is a warm-up phase for all agents in  $\mathcal{L}_j = \{j' : m^*(j) \in NTT(j')\}$ .
- (iii) For each arm  $k \notin G_j^* \cup m^*(j)$  (neither be globally deleted nor stable matched arm of agent  $j$ ), arm  $k$  is successfully matched with agent  $j$  in phase  $i$  at most  $\frac{10\alpha i}{\Delta_{j,k}^2}$  times.
- (iv) The stable matched arm  $m^*(j)$  is selected the most number of times in phase  $i$ .

The definition of  $\tilde{\alpha}$ -Good Phase is naturally to be brought up that during this phase, agent  $j$  has collisions with low probability. When agent  $j$  selects an arm competing with a more preferred agent by this arm, it receives zero reward with high probability (w.h.p.), thus condition (i) in Definition 4 is necessary for a lower regret. Recall that the stable matched pair may not be the best pair for  $j$ , (ii) aims to limit arms in other agents'  $NTT$  sets to avoid too many conflicts. And (iii), (iv) are beneficial for other agents to estimate the stable matching of agent  $j$ . Similarly, we define  $\tilde{\alpha}$ -Low Collision Phase as [7]:

**Definition 5.** We say phase  $i$  is a  $\tilde{\alpha}$ -**Low Collision Phase** for agent  $j$  under  $\tilde{\alpha}$ -condition if:

- (i) Phase  $i$  is a  $\tilde{\alpha}$ -Good Phase for agent 1 to agent  $j$ ;
- (ii) Phase  $i$  is a  $\tilde{\alpha}$ -Good Phase for agent  $j' \in \cup_{k \in \mathcal{H}_j} \mathcal{B}_{j,k}$ .

531 Define that

$$F_{\alpha j} = \max \left( i_1, \min(\{i : \prod_{i' \geq i} \left( \prod_{j'=1}^{j-1} \mathbb{1}_{G_\alpha}[i', j'] \right) \left( \prod_{j'' \in \mathcal{L}_j} \mathbb{1}_W[i', j''] \right) = 1\} \cup \{\infty\}) \right), \quad (1)$$

532 and

$$V_{\alpha j} = \max \left( i_1, \min(\{i : \prod_{i' \geq i} \mathbb{1}_{LC_\alpha}[i', j] = 1\} \cup \{\infty\}) \right), \quad (2)$$

533 where the definitions of  $\mathbb{1}_{LC_\alpha}[i, j]$  and  $\mathbb{1}_{G_\alpha}[i, j]$  is similar to  $\mathbb{1}_W[i, j]$ .

534 Hence, all phases on and after phase  $F_{\alpha j}$  are  $\tilde{\alpha}$ -Good Phase and all phases after phase  $V_{\alpha j}$  are  $\tilde{\alpha}$ -Low  
535 Collision Phase for agent  $j$ . Hence,  $\mathbb{1}_W[i, j]$ ,  $\mathbb{1}_{LC_\alpha}[i, j]$  and  $\mathbb{1}_{G_\alpha}[i, j]$  are the indicator to represent  
536 whether phase  $i$  is a warm-up phase,  $\tilde{\alpha}$ -low deletion phase and  $\tilde{\alpha}$ -good phase respectively.

537 Before we give the complete proof of the regret bound in Theorem 3, we propose some propositions.

538 **Proposition 1.** *The stable matched arm  $m^*(j)$  for agent  $j$  can be blocked by agents in  $\mathcal{L}_j$ , where*  
539  $\mathcal{L}_j = \{j' : m^*(j) \in NTT(j')\}.$

540 *Proof.* Assume that we have stable matching  $m^*$ . By contradiction, if  $j \succ_{m^*(j')} j'$  but  $\mu_{j, m^*(j)} <$   
541  $\mu_{j, m^*(j')}$ , then  $(j, m^*(j'))$  forms a blocking pair since they prefer each other than matched one  
542 but they are unmatched, this leads to the instability of  $m^*$ . So, if  $j \succ_{m^*(j')} j'$ , then  $\mu_{j, m^*(j)} >$   
543  $\mu_{j, m^*(j')}$  under the stable matching. Thus, if  $j' \succ_{m^*(j)} j$ , then  $\mu_{j', m^*(j')} > \mu_{j, m^*(j)}$ , then  $m^*(j) \in$   
544  $NTT(j')$ .  $\square$

545 Proposition 1 tells us that  $m^*(j)$  can be blocked only by agents in  $\mathcal{L}_j$ , and the next proposition gives  
546 the range of  $\mathcal{L}_j$ .

547 **Proposition 2.** *For each agent  $j \in [N]$ ,  $\mathcal{L}_j \subseteq \bigcup_{j'=1}^{lr(j)-1} \mathcal{A}_{j'}$*

548 *Proof.* Under  $\tilde{\alpha}$ -condition, for  $\forall k < j \leq K$ ,  $c_k \in [K]_r$ ,  $A_j \in [N]_r$ ,  $\gamma^*(c_k) \succ_{c_k} A_j$ . And by  
549 Theorem 1,  $\gamma^*(c_k) = \mathcal{A}_k$ . Therefore, for  $\forall j, j' \in [N]$ , and  $j < j'$ ,  $A_j \succ_{m^*(A_j)} A_{j'}$ . In particular,  
550 for any  $j' > lr(j)$ , we have  $j = A_{lr(j)} \succ_{m^*(j)} A_{j'}$ . This implies that for  $\forall j' \geq lr(j)$ , we  
551 can not obtain  $j' \succ_{m^*(j)} j$ , hence  $m^*(j) \notin NTT(j')$ , that is, for  $\forall j' \geq lr(j)$ ,  $j' \notin \mathcal{L}_j$ . Then  
552  $\mathcal{L}_j \subseteq \bigcup_{j'=1}^{lr(j)-1} \mathcal{A}_{j'}$ .  $\square$

553 **Proposition 3.** *For each agent  $j \in [N]$ ,  $F_{\alpha j} \leq \max \{U_{(lr(j)-1)}, \max(F_{\alpha j'} : 1 \leq j' \leq j-1)\}$*   
554 *with probability 1.*

555 *Proof.* By definition of  $U_j$ , we know that on and after phase  $U_{(lr(j)-1)}$ , all agents  $\{\mathcal{A}_{j'} : j' =$   
556  $1, 2, \dots, lr(j) - 1\}$  are in warm-up phase. By proposition 2, the set of deadlock agents as  $\mathcal{L}_j \subseteq$   
557  $\bigcup_{j'=1}^{lr(j)-1} \mathcal{A}_{j'}$ . Hence, all agents in  $\mathcal{L}_j$  are also in warm-up phase on and after  $U_{lr(j)-1}$ . Further, the  
558 agents 1 to  $(j-1)$  are in  $\tilde{\alpha}$ -good phase from phase  $\max(F_{\alpha j'} : 1 \leq j' \leq j-1)$  onwards. Then the  
559 proposition holds w.p.1.  $\square$

560 As the events decomposition for regret minimization block in Lemma 6 requires that  $m^*(j)$  always  
561 exit and will not be deleted, it is important to find conditions or a certain phase with good properties  
562 to guarantee that  $m^*(j)$  will not be globally deleted or locally deleted. The next lemma give us  
563 theoretical guarantee.

564 **Lemma 3.** *Let  $i_1 = \min \left\{ i : (N-1) \frac{10\alpha i}{\Delta^2} < \theta 2^{i-1} \right\}$ , for any phase  $i$  ( $i \geq i_1$ ) and any agent*  
565  *$j \in [N]$ , the following properties holds.*

566 (a) *If phase  $i$  and  $(i-1)$  are warm-up phases for all  $j' \in \mathcal{L}_j$ , then  $m^*(j)$  will not be globally*  
567 *deleted or locally deleted almost surely, i.e.  $m^*(j) \notin \mathcal{L}_j[i] \cup G_j[i]$ .*

568 (b) If phase  $i \geq \min \{U_{lr(j)-1}, F_{\alpha_j}\} + 1$ , then  $m^*(j) \notin \mathcal{L}_j[i] \cup G_j[i]$  a.s.

569 (c) If phase  $i \geq V_{\alpha_j} + 1$  is a low collision phase for agent  $j$  then  $\mathcal{L}_j[i] = \emptyset$  a.s.

570 *Proof.* (i) All agents  $j'$  can block arm  $m^*(j)$  are in  $\mathcal{L}_j$  by Proposition 1. And  $m^*(j) \in NTT(j')$   
 571 for any agent  $j' \in \mathcal{L}_j$  due to the definition of  $\mathcal{L}_j$ . Therefore, if all agents in  $\mathcal{L}_j$  are in warm-up phase  
 572 in phase  $(i - 1)$ , then  $m^*(j) \notin G_j[i]$  because by the definition of warm-up phase for agent  $j'$  and  
 573  $m^*(j) \in NTT(j')$ , so  $m^*(j)$  is not agent  $j'$ 's most matched arm. Hence,  $m^*(j) \notin G_j[i]$ . further-  
 574 more, the total number of times the arm  $m^*(j)$  can be deleted is at most  $\left(\sum_{i=1}^{lr(j)-1} q_i - 1\right) \frac{10\alpha_i}{\Delta_{j,k}^2}$  for  
 575 any  $i \geq i_1$ , which is less than the local deletion threshold. So  $m^*(j) \notin \mathcal{L}_j[i] \cup G_j[i]$  after phase  $i_1$ .

576 (ii) (a)  $\mathcal{L}_j \subseteq \bigcup_{j'=1}^{lr(j)-1} \mathcal{A}_{j'}$  holds by Proposition 3, this implies that for phase  $i \geq U_{lr(j)-1} + 1$  (i.e.  
 577  $i - 1 \geq U_{lr(j)-1} + 1$ ) is a warm-up phase for all agents in  $\mathcal{L}_j = \{j' : m^*(j) \in NTT(j')\}$ .

578 (b) By the definition of  $F_{\alpha_j}$ , all agents in  $\mathcal{L}_j = \{j' : m^*(j) \in NTT(j')\}$  are in warm-up phase for  
 579 phase  $i \geq F_{\alpha_j} + 1$ .

580 By (a), (b) and (i) we know that (ii) holds.

581 (iii) It can easily check by the definition of  $V_{\alpha_j}$ . □

### 582 A.3 Proof for Theorem 3

583 After defining  $F_{\alpha_j}$  and  $V_{\alpha_j}$ <sup>3</sup>, we divide the whole process into two main modules: the process before  
 584 phase  $F_{\alpha_j}$  and after  $F_{\alpha_j}$ . We denote  $S_i$  by the beginning time point of phase  $i$ . The regret during time  
 585 period  $[S_{F_{\alpha_j}}, T]$  can be decomposed by four blocks: Local Deletion Block, Communication Block,  
 586 Collision Block and Sub-optimal Block. The regret during time period  $[0, S_{F_{\alpha_j}}]$  can be bounded by  
 587 induction with  $j$  (Lemma 7).

588 **Local Deletion Block.** Lemma 3 implies that there is no collision after phase  $V_{\alpha_j}$ , so we only need  
 589 to consider the regret from  $F_{\alpha_j} + 1$  to  $V_{\alpha_j}$ . Following our algorithm, there is at most  $\theta 2^{i-1}$  collisions  
 590 when pulling an arm from the set  $\mathcal{H}_j$  in each round. This amounts to

$$\begin{aligned} & \sum_{i=(F_{\alpha_j}+1)}^{V_{\alpha_j}} \sum_{k \in \mathcal{H}_j} \theta \cdot 2^{i-1} \leq \sum_{i=(F_{\alpha_j}+1)}^{V_{\alpha_j}} \theta |\mathcal{H}_j| \cdot 2^{i-1} \\ & < \frac{1 - 2^{V_{\alpha_j}-1}}{1 - 2} \theta |\mathcal{H}_j| = (2^{V_{\alpha_j}-1} - 1) \theta |\mathcal{H}_j| \\ & = S_{V_{\alpha_j}} \cdot \theta |\mathcal{H}_j| \leq \min(S_{V_{\alpha_j}}, 1) \cdot \theta |\mathcal{H}_j|. \end{aligned}$$

591 **Communication Block.** In the communication block, there are  $N$  sub-blocks, and the duration  
 592 of each sub-block is  $K$ . Agent  $j$  pulls arm 1, arm 2,  $\dots$ , arm  $K$  in order in the  $j$ -th block and pulls  
 593  $\mathcal{O}_j[i]$  in other blocks, where  $\mathcal{O}_j[i]$  is the arm that it matched the most times in the regret minimization  
 594 block in phase  $i$ . The best arm for agent  $j$  is not played in all but  $(K - 1)$  number of steps for each  
 595 communication phase after phase  $F_{\alpha_j} + 1$ , and other agents  $j'$  collide at most once after phase  $V_{\alpha_j}$   
 596 (since each of them enters good phase).

597 **Collision Block.** The regret caused by collision from phase  $F_{\alpha_j} + 1$  to  $V_{\alpha_j}$  has been included  
 598 in the previous communication block (the regret of the period during  $F_{\alpha_j} + 1$  and  $V_{\alpha_j}$  is rel-  
 599 atively loose), so we only consider the regret after phase  $V_{\alpha_j}$ . After phase  $V_{\alpha_j} + 1$ , regret  
 600 comes from the collision between agent  $j$  and the agents in the set  $\mathcal{B}_{j,k}$ . And by the definition  
 601 of  $V_{\alpha_j}$ , agent  $j$  and agent  $j' \in \mathcal{B}_{j,k}$  have deleted dominated arms for themselves, this leads to  
 602  $\sum_{k \notin G_j^*} \sum_{j' \in \mathcal{B}_{j,k}: k \notin G_{j'}^*} \mu_{j,m^*(j)} \left( N_{j',k}(T) - N_{j',k}(S_{V_{\alpha_j}}) \right).$

<sup>3</sup>Under  $\tilde{\alpha}$ -condition it is no longer the case as agent 1 is not the most preferred agent for arm 1. For agent  $A_1$  and its stable match arm  $c_1$ ,  $c_1$  may not be the best arm for agent  $A_1$  but for arm  $c_1$  we have  $A_1$  as its best agent. Therefore, agent  $A_1$  will not delete it's stable match pair arm  $a_1$ , but unless global deletion eliminates better arms it will not converge to this arm.



603 **Sub-optimal Play Block.** From phase  $F_{\alpha j} + 1$  on-wards, regret happens for agent  $j$  when  
 604 agent  $j$  selects arm  $k \notin G_j^* \cup m^*(j)$  and successfully be matched. This amounts to  
 605  $\sum_{k \notin G_j^* \cup m^*(j)} \Delta_{jk}(N_{jk}(T) - N_{jk}(S_{F_{\alpha j}}))$  regret, and it can be upper bounded by Lemma 6.

606 Then we illustrate the relationship among those phases with good properties and indicators. We first  
 607 show that for phases  $i \geq U_{\alpha j-1} + 1$ , the probability that phase  $i$  is not a Warm-up phase for agent  
 608  $A_j$  is low. Let

$$i_1 = \min\{i : (N-1)\frac{10\alpha i}{\Delta^2} < \theta 2^{(i-1)}\} \quad (3)$$

$$i_2 = \min\{i : C(i-1) - 1 \leq 2^{i+1}\}, \quad (4)$$

609 then we have the following lemma.

610 **Lemma 4.** For phase  $i \geq i^* = \max(8, i_1, i_2)$ , and for  $\forall j \in [N]$ ,  $\alpha > 1$ , then the following holds:

$$\mathbb{P}((\mathbb{1}_W[i, A_j] = 0) \cap (i \geq U_{j-1} + 1)) \leq (K-j)2^{-i(\alpha-1)} \left(1 + \frac{64}{\Delta^2}\right).$$

611 Similarly, we give the relationship between  $F_{\alpha j}$  and  $\alpha$ -Good phase.

**Lemma 5.** For any agent  $j$  and phase  $i \geq i^*$ , and for  $\alpha > 1$ , then

$$\mathbb{P}((\mathbb{1}_{G_\alpha}[i, j] = 0) \cap (i \geq F_{\alpha j} + 1)) \leq (K-j)2^{-i(\alpha-1)} \left(1 + \frac{64}{\Delta^2}\right).$$

612 We only give the proof of Lemma 4, and another one can similarly be verified.

*Proof.*

$$\begin{aligned} & \mathbb{P}((\mathbb{1}_W[i, A_j] = 0) \cap (i \geq U_{\alpha j-1} + 1)) \\ & \leq \mathbb{P} \left( \bigcup_{k \in NTT(A_j)} \{(N_{A_j,k}[i] - N_{A_j,k}[i-1]) > \frac{10\alpha i}{\Delta_{A_j,k}^2}\} \cap (i \geq (U_{\alpha j-1} + 1)) \right) \\ & \stackrel{(ii)}{\leq} \sum_{k \in NTT(A_j)} \mathbb{P} \left( \left( \bigcup_{t \in S_i}^{(S_{i+1}-1)} N_{A_j,k}(t) = \frac{10\alpha i}{\Delta_{A_j,k}^2} \right) \cap (I_t(A_j) = k) \cap (i \geq (U_{\alpha j-1} + 1)) \right) \\ & \stackrel{(iii)}{\leq} \sum_{k \in NTT(A_j)} \sum_{t \in S_i}^{(S_{i+1}-1)} \mathbb{P} \left( (N_{A_j,k}(t) = \frac{10\alpha i}{\Delta_{A_j,k}^2}) \cap (u_{A_j,k}(t-1) > u_{A_j,a_j}(t-1)) \right) \\ & \leq |NTT(A_j)| 2^{-i(\alpha-1)} \left(1 + \frac{64}{\Delta^2}\right) \\ & \leq (K-j)2^{-i(\alpha-1)} \left(1 + \frac{64}{\Delta^2}\right). \end{aligned}$$

613 The inequality (i) is because that if phase  $i$  is not a Warm-up phase for agent  $A_j$ , there exists an  
 614 arm  $k \in NTT(A_j)$ , which is played more than  $\frac{10\alpha i}{\Delta_{A_j,k}^2}$  times in phase  $i$ . Next, (ii) holds since  
 615 the probability of union is less than or equal to the sum of probability. By Lemma 3,  $m^*(A_j) \notin$   
 616  $G_{A_j}[i] \cup L_{A_j}[i]$ . Hence, the inequality (iii) holds since  $I_t(A_j) = k$  is equivalent to that the UCB  
 617 index (line 7 in Algorithm 1) of arm  $m^*(j) = a_j$  can not be less than arm  $k$ .  $\square$

618 We now give the upper bound of  $\mathbb{E}[N_{jk}(T) - N_{jk}(S_{F_{\alpha j}})]$ , which is helpful to bound the regret  
 619 resulting from collision block and sub-optimal block.

**Lemma 6.** For  $\forall j \in [N]$ ,  $k \notin G_j^* \cup m^*(j)$ , for  $\alpha > 1$ ,

$$\mathbb{E}[N_{j,k}(T) - N_{j,k}(S_{F_{\alpha j}})] \leq \phi(\alpha) \frac{8}{\Delta_{j,k}^2} + 1 + \frac{8}{\Delta_{j,k}^2} \left( \alpha \log(T) + \sqrt{\pi \alpha \log(T)} + 1 \right).$$

620 *Proof.* Due to Lemma 3,  $m^*(j)$  will not be globally deleted or locally deleted after phase  $i \geq$   
621  $(F_{\alpha_j} + 1)$ . Denote  $I_j(t)$  as the arm that agent  $j$  pulls at time  $t$ . After phase  $F_{\alpha_j}$ , the reason for  
622 agent  $j$  pulling arm  $k$  rather than  $m^*(j)$  are as follows: (1) the *UCB* index of the optimal arm  $m^*(j)$   
623 is less than  $\mu_{j,m^*(j)} - \epsilon$ ; (2)  $I_j(t) = k$  and its *UCB* index is larger than  $\mu_{j,m^*(j)} - \epsilon$ . For any  
624  $k \notin G_j^* \cup m^*(j)$  and  $\epsilon > 0$ ,

$$\begin{aligned} N_{j,k}(T) - N_{j,k}(S_{F_{\alpha_j}}) &= \sum_{t=S_{F_{\alpha_j}}+1}^T \mathbb{1}\{I_t(j) = k\} \\ &\leq \sum_{t=S_{F_{\alpha_j}}+1}^T \left[ \underbrace{\mathbb{1}\{(u_{j,k}(t) \geq \mu_{j,m^*(j)} - \epsilon) \wedge (I_t(j) = k)\}}_{(a)} + \underbrace{\mathbb{1}\{u_{j,m^*(j)} \leq \mu_{j,m^*(j)} - \epsilon\}}_{(b)} \right]. \end{aligned}$$

625 First, we bound (a).

$$\begin{aligned} &\mathbb{E} \left[ \sum_{t=S_{F_{\alpha_j}}+1}^T \mathbb{1}\{(u_{j,k}(t) \geq \mu_{j,m^*(j)} - \epsilon) \wedge (I_t(j) = k)\} \right] \\ &\leq \mathbb{E} \left[ \sum_{t=S_{F_{\alpha_j}}+1}^T \mathbb{1}\left\{(\hat{\mu}_{j,k}(t-1) + \sqrt{\frac{2\alpha \log(t)}{N_{j,k}(t-1)}} \geq \mu_{j,m^*(j)} - \epsilon) \wedge (I_t(j) = k)\right\} \right] \\ &\leq \mathbb{E} \left[ \sum_{t=1}^T \mathbb{1}\left\{(\hat{\mu}_{j,k}(t-1) + \sqrt{\frac{2\alpha \log(T)}{N_{j,k}(t-1)}} \geq \mu_{j,m^*(j)} - \epsilon) \wedge (I_t(j) = k)\right\} \right] \\ &\leq \mathbb{E} \left[ \sum_{s=1}^T \mathbb{1}\left\{(\hat{\mu}_{j,k}(s) + \sqrt{\frac{2\alpha \log(T)}{s}} \geq \mu_{j,k} + \Delta_{j,k} - \epsilon)\right\} \right] \\ &\leq 1 + \frac{2}{(\Delta_{j,k} - \epsilon)^2} \left( \alpha \log(T) + \sqrt{\alpha \pi \log(T)} + 1 \right). \end{aligned}$$

626 Then we turn to bound (b)

$$\begin{aligned} &\mathbb{E} \left[ \sum_{t=S_{F_{\alpha_j}}+1}^T u_{j,m^*(j)} \leq \mu_{j,m^*(j)} - \epsilon \right] \\ &\leq \mathbb{E} \left[ \sum_{t=1}^T u_{j,m^*(j)} \leq \mu_{j,m^*(j)} - \epsilon \right] \\ &\leq \mathbb{E} \left[ \sum_{t=1}^T \sum_{s=1}^T \mathbb{P} \left( \hat{\mu}_{j,k}(t-1) + \sqrt{\frac{2\alpha \log(t)}{N_{j,k}(t-1)}} \leq \mu_{j,m^*(j)} - \epsilon \right) \right] \\ &\leq \sum_{t=1}^T \sum_{s=1}^T \exp \left( -\frac{s}{2} \left( \sqrt{\frac{2\alpha \log(t)}{s}} + \epsilon \right)^2 \right) \\ &\leq \sum_{t=1}^T t^{-\alpha} \sum_{s=1}^T \exp \left( -\frac{s\epsilon^2}{2} \right) \\ &\leq \psi(\alpha) \frac{2}{\epsilon^2}. \end{aligned}$$

627 By choosing  $\epsilon = \frac{\Delta_{j,k}}{2}$ , we have

$$\mathbb{E} [N_{j,k}(T) - N_{j,k}(S_{F_{\alpha_j}})] \leq \psi(\alpha) \frac{8}{\Delta_{j,k}^2} + 1 + \frac{8}{\Delta_{j,k}^2} \left( \alpha \log(T) + \sqrt{\alpha \pi \log(T)} + 1 \right).$$

628

□

629 We define  $lr_{\max}(j) = \max\{lr(j') : 1 \leq j' \leq j\}$ , and  $\tilde{F}_j = \max \left( U_{lr_{\max}(j)-1}, \max(\tilde{F}_{j'} : 1 \leq \right.$   
630  $\left. j' \leq (j-1) \right)$ , and  $\tilde{F}_j > F_{\alpha j}$ . Then we introduce a lemma to bound the probability that a phase  $i$  is  
631 not an  $\tilde{\alpha}$ -Good phase when  $i \geq F_{\alpha j} + 1$ .  
632 **Lemma 7.** *For any  $j \in [N]$  and  $m \geq 1$ , the following hold with  $i^*$  ( $i^* = \max\{8, i_1, i_2\}$ )*

$$\begin{aligned} \mathbb{E}[\tilde{F}_j^m] &\leq 2i_1 + (lr_{\max}(j) + j - 2) \left( (i^*)^m + K \left( 1 + \frac{64}{\Delta^2} \right) \right) \frac{2^{-(\alpha-1)(i^*-2)}}{(2^{(\alpha-1)} - 1)^2}, \\ \mathbb{E}[2^{\tilde{F}_j}] &\leq 2i_1 + (lr_{\max}(j) + j - 2) \left( 2^{i^*} + K \left( 1 + \frac{64}{\Delta^2} \right) \right) \frac{2^{-(\alpha-1)(i^*-2)}}{(2^{(\alpha-1)} - 1)^2}. \end{aligned}$$

633 The proof is the same as [7].

634 Hence, the upper bound of  $\mathbb{E}[S_{F_{\alpha j}}]$  is

$$\begin{aligned} \mathbb{E}[S_{F_{\alpha j}}] &= \mathbb{E}[C(F_{\alpha j} - 1) + 2^{F_{\alpha j}}] \leq \mathbb{E}[C(\tilde{F}_j - 1) + 2^{\tilde{F}_j}] \\ &\leq C(2i_1 - 1) + C(lr_{\max}(j) + j - 2)i^* + (lr_{\max}(j) + j - 2)2^{i^*} \\ &\quad + (C + 1)(lr_{\max}(j) + j - 2)K \left( 1 + \frac{64}{\Delta^2} \right) \frac{2^{-(\alpha-1)(i^*-2)}}{(2^{(\alpha-1)} - 1)^2}, \end{aligned}$$

635 where  $C$  is a constant term.

Then for formula with term  $\mathbb{E}[S_{V_{\alpha j}}]$ , we can transform its upper bound to another term related to  $\mathbb{E}[S_{\tilde{F}_{J_{\max}(j)}}]$  since

$$V_{\alpha j} = \max \left( F_{\alpha(j+1)}, \cup_{k \in \mathcal{H}_j \cup_{j' \in \mathcal{B}_{jk}} F_{\alpha j}} \right) \leq \max \left( \tilde{F}_{(j+1)}, \cup_{k \in \mathcal{H}_j \cup_{j' \in \mathcal{B}_{jk}} \tilde{F}_{(j+1)}} \right) = \tilde{F}_{J_{\max}(j)}.$$

636 Hence,  $\mathbb{E}[S_{V_{\alpha j}}] \leq \mathbb{E}[S_{\tilde{F}_{J_{\max}(j)}}]$ .

637 Lastly, the regret can be bounded by the decomposition of  $\mathbb{E}[S_{F_{\alpha j}}]$  and phases after  $S_{F_{\alpha j}}$  with  
638 properties above, where phases on and after  $S_{F_{\alpha j}}$  contain local deletion, collision, communication,  
639 sub-optimal play blocks.

$$\begin{aligned} \mathbb{E}[R_j(T)] &\leq \mathbb{E}[S_{F_{\alpha j}}] + \min(\theta|\mathcal{H}_j|, 1)\mathbb{E}[S_{V_{\alpha j}}] + ((K - 1 + |\mathcal{B}_{j, m^*(j)}|)\log_2(T) + NK\mathbb{E}[V_{\alpha j}]) \\ &\quad + \sum_{k \notin G_j^*} \sum_{j' \in \mathcal{B}_{j, k} : k \notin G_{j'}^*} \frac{8\alpha\mu_{kj^*}}{\Delta_{j', k}^2} \left( \log(T) + \sqrt{\frac{\pi}{\alpha} \log(T)} \right) + \sum_{k \notin G_j^* \cup m^*(j)} \frac{8\alpha}{\Delta_{j, k}} (\log(T) + \sqrt{\frac{\pi}{\alpha} \log(T)}) \\ &\quad + NK \left( 1 + (\phi(\alpha) + 1) \frac{8\alpha}{\Delta^2} \right) \leq \sum_{k \notin G_j^*} \sum_{j' \in \mathcal{B}_{j, k} : k \notin G_{j'}^*} \frac{8\alpha\mu_{kj^*}}{\Delta_{j', k}^2} \left( \log(T) + \sqrt{\frac{\pi}{\alpha} \log(T)} \right) \\ &\quad + \sum_{k \notin G_j^* \cup m^*(j)} \frac{8\alpha}{\Delta_{j, k}} \left( \log(T) + \sqrt{\frac{\pi}{\alpha} \log(T)} \right) + c_j \log_2(T) \\ &\quad + O \left( \frac{N^2 K^2}{\Delta_{\min}^2} + \left( \min(1, \theta|\mathcal{H}_j|) f_{\tilde{\alpha}}(J_{\max}(j)) + f_{\tilde{\alpha}}(j) - 1 \right) 2^{i^*} + N^2 K i^* \right). \end{aligned}$$

## 640 B Proof for Unique Stable Conditions

### 641 B.1 Uniqueness Conditions in One-to-one Matching.

642 There are many existing conditions that guarantee the unique stable matching in one-to-one setting,  
643 like the *Serial Dictatorship* [34], the *No Crossing Condition (NCC)* [10], the *Sequential Preference*

644 *Condition (SPC)* [11], the  $\alpha$ -Condition [19]. Previous works tell us that *top-top match* and *SPC*  
645 condition can lead to a unique stable matching in both one-to-one [26, 10] and many-to-one setting  
646 [28]. [26] use the *Top-top match* property instead of  $\alpha$ -reducibility<sup>4</sup> for the same meaning in the  
647 one-to-one setting. *Serial Dictatorship* in one-to-one setting means that for each agent, the arms are  
648 ranked heterogeneously, in an increasing order of arm-means which is different for each agent-arm  
649 pair while the agents are ranked homogeneously across all arms, and vice versa. Followed by [29, 26],  
650 we know that *Aligned preference* is equal to *Serial dictatorship* in marriage problem as they are both  
651 equivalent to no cycle property. And *NCC* and *Serial Dictatorship* are not mutually inclusive, which  
652 can be seen in [10]. Hence, the relationship can be represented intuitively in figure 5:

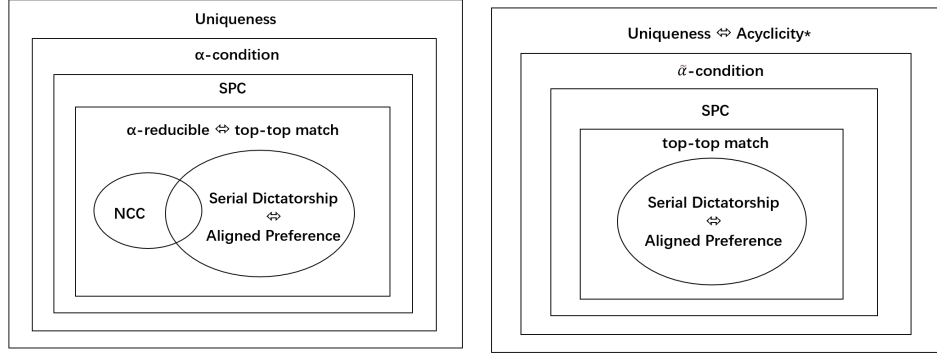

Figure 5: Relations of Unique Stable Matching in One-to-one (left) and Many-to-one (right).

## 653 B.2 Uniqueness Conditions in Many-to-one Setting.

654 In this section, we focus on conditions that guarantee the unique stable matching in the many-to-one  
655 setting, such as *SPC*, [28], *Aligned Preference*, *Serial Dictatorship* *Top-top match* and *Acyclicity*  
656 [26, 2, 28] and give the proof of the relationships among uniqueness conditions<sup>5</sup>.

**Definition 6.** (*Aligned Preference.*) In a many-to-one market  $\mathcal{M} = (\mathcal{K}, \mathcal{J}, \mathcal{P})$ ,  $\mathcal{K} = (k)_{k \in [K]}$ ,  $\mathcal{J} = (j)_{j \in [N]}$ , if the preference profile  $\mathcal{P}$  satisfies

$$\forall k \in \mathcal{K}, j \succ_k j', \forall j < j' \quad (1.a)$$

$$\forall j \in \mathcal{N}, k \succ_j k', \forall k < k' \quad (1.b)$$

657 then the market has aligned preference. The one-to-one setting has the same definition.

658 **Definition 7.** (*Serial Dictatorship*) We say that if all arms (school) have the same preference for  
659 agents (students), while agents' preferences are heterogeneous (vice versa), then the system satisfies  
660 serial dictatorship.

661 **Definition 8.** (*Top-top Match*) A stable pair  $(k, j)$  is a *Top-top match* for sub-market  $\mathcal{M}' \in \mathcal{M}$  if,  
662 for arm  $k$ , agent  $j$  is the favorite candidate in  $\mathcal{M}'$ , and vice versa.

663 **Definition 9.** (*SPC*) *SPC* condition in the many-to-one setting [28] is to require the existence  
664 of a sequence of agents  $1, 2, \dots, N$  in which each agent appears once, and a sequence of arms  
665  $1, 2, \dots, K$  in which each arm appears once for each seat in its capacity, such that  $k \succ_j k'$  for every  
666  $k' > k$  and  $j \in [N]$ ; in addition, such that  $j \succ_k j'$  for every  $j' > j$  and  $k \in [K]$ .

### 667 B.2.1 Proof for Lemma 1.

668 *Proof.*  $\Rightarrow$ :

<sup>4</sup>[27, 10] introduce that a matching problem is  $\alpha$ -reducible if there is a top trading single or pair for every sub-problem.

<sup>5</sup>The remark in [26] tells us that *Aligned Preference* is stronger than *Top-top match* and *SPC* condition.

Table 1: Preference Profiles

| (a) Exm1: Companies |                               | (b) Exm1: Workers |                   |
|---------------------|-------------------------------|-------------------|-------------------|
| $c_1 :$             | $s_1 > s_2 > s_3 > s_4 > s_5$ | $s_1 :$           | $c_1 > c_2 > c_3$ |
| $c_2 :$             | $s_2 > s_3 > s_4 > s_5 > s_1$ | $s_2 :$           | $c_2 > c_3 > c_1$ |
| $c_3 :$             | $s_3 > s_4 > s_5 > s_1 > s_2$ | $s_3 :$           | $c_3 > c_2 > c_1$ |
|                     |                               | $s_4 :$           | $c_3 > c_1 > c_2$ |
|                     |                               | $s_5 :$           | $c_2 > c_1 > c_3$ |
| (c) Exm2: Companies |                               | (d) Exm2: Workers |                   |
| $c_1 :$             | $s_1 > s_2 > s_3 > s_4 > s_5$ | $s_1 :$           | $c_1 > c_3 > c_2$ |
| $c_2 :$             | $s_3 > s_2 > s_1 > s_4 > s_5$ | $s_2 :$           | $c_1 > c_2 > c_3$ |
| $c_3 :$             | $s_1 > s_5 > s_2 > s_4 > s_3$ | $s_3 :$           | $c_2 > c_1 > c_3$ |
|                     |                               | $s_4 :$           | $c_1 > c_2 > c_3$ |
|                     |                               | $s_5 :$           | $c_3 > c_2 > c_1$ |

**Serial Dictatorship  $\Rightarrow$  Aligned Preference.** In order to distinguish the symbols of agents and arms, we consider arms set  $\{c_k, k = 1, 2, \dots, K\}$  and agents set  $\{s_j : j = 1, 2, \dots, N\}$ . If arms have the same preference for individual agent, then there is no cycle in the preference of the arm, i.e. there is no case that

$$\exists T, s_0 \succ_{c_0} s_T \succ_{c_T} s_{T-1} \dots s_1 \succ_{c_1} s_0$$

for  $s_0, s_1, \dots, s_T$  and  $c_0, c_1, \dots, c_T$ . Otherwise, assume that there exists the cycle above, then by the same preference of arms, we know that  $\succ_{c_0} = \succ_{c_1}$ . And then  $s_0 \succ_{c_0} s_1$  and  $s_1 \succ_{c_1} s_0$ , hence  $s_0 \succ_{c_0} s_1$  and  $s_1 \succ_{c_0} s_0$ , which yields a contradiction.

Now we prove that no cycle property implies *Aligned preference*. By contradiction, if there exists a  $c_l$  such that  $s_k \succ_{c_l} s_j$ , for  $k > j$ , then we can construct a cycle:

$$s_k \succ_{c_l} s_j \succ_{c_j} s_{j-1} \dots s_{k-2} \succ_{c_{k-1}} s_{k-1} \succ_{c_k} s_k.$$

$\Leftarrow$ ):

**Aligned Preference  $\Rightarrow$  Serial Dictatorship.** We first illustrate that aligned preference leads to no cycle property. By contradiction, if there is a cycle

$$s_1 \succ_{c_1} s_T \succ_{c_T} s_{T-1} \dots s_2 \succ_{c_2} s_1$$

for some  $s_1, s_2, \dots, s_T, c_1, c_2, \dots, c_T$  and  $T$ . It is obvious that it yields  $s_1 \succ_{c_1} s_T, T > 1$ , which contradicts the aligned principle. Then, if there is no cycle of length two, which implies that all college have the same preferences because all students are acceptable to every college, which induces the group serial dictatorship property.

□

## B.2.2 Proof for Theorem 2.

### (i) Proof for the relationship between SPC and $\tilde{\alpha}$ -condition

SPC states that after eliminating all Top-top match, there is at least one new Top-top match in the remaining system under the restricted preference profile. Then it satisfies  $\tilde{\alpha}$ -condition naturally. However, examples below tell us that SPC can not imply  $\tilde{\alpha}$ -condition. We give two examples to illustrate this relationship where the order that an agent successfully matches with its stable pair corresponds to the left order and right order.

**Example** Consider a market with three companies and five workers. Assume that the preference profile of companies  $c_1, c_2, c_3$  and workers  $s_1, s_2, s_3, s_4, s_5$  is as follows and the capacities are 2, 1, 2 respectively for  $c_1, c_2, c_3$ .

The preference in Table 1 (1(a))(1(b)) satisfies both SPC and  $\tilde{\alpha}$ -condition with valid order  $\{(c_2, s_2), (c_3, s_3, s_4), (c_1, s_1, s_5)\}$ . While preference in Table 1 (1(c))(1(d)) only satisfies  $\tilde{\alpha}$ -condition with valid left order  $\{(c_1, s_1, s_2), (c_2, s_3), (c_3, s_4, s_5)\}$  and right order

691  $\{(c_2, s_3), (c_1, s_1, s_2), (c_3, s_4, s_5)\}$ , and *SPC* does not hold.  
692

693 **(ii) Proof for the relationship between Unqc and  $\tilde{\alpha}$ -condition**

694  $\Leftarrow$  : **Sufficiency:** If  $\tilde{\alpha}$ -condition holds, then the agent-proposing Gale-Shapley algorithm and the  
695 arm-proposing Gale-Shapley algorithm leads to matching  $m$  in all consistent restrictions.  
696

697  $\Rightarrow$  : **Necessity:** We first prove for  $K = 2, N = q_1 + q_2$  case. Assume that there are two arms  $c_1, c_2$ ,  
698 each has capacity  $q_k (k = 1, 2)$  and the agents set  $S = s_1, s_2, \dots, s_{q_1+q_2}$ . By contradiction, assume  
699 that Unqc is satisfied while  $\tilde{\alpha}$ -condition is not. Then we know that not all matching pairs are Top-top  
700 match, so there exists an agent  $s_k, c_1 \succ_{s_k} c_2$ , but  $s_k$  is not in the agents set that first  $q_1$  preferred by  
701  $c_1$ . The matched result may have two cases:

$$\begin{aligned} & (\underbrace{\dots\dots\dots}_{q_1}, c_1) \text{ and } (s_k, \underbrace{\dots\dots\dots}_{q_2-1}, c_2) \quad (i), \\ & (s_k, \underbrace{\dots\dots\dots}_{q_1-1}, c_1) \text{ and } (\underbrace{\dots\dots\dots}_{q_2}, c_2) \quad (ii). \end{aligned}$$

702 We first consider matching (ii). If  $s_k$  matches  $c_1$ , then there must be an agent in  $\mathcal{A}_1$  matches with  
703  $c_2$ . Let's assume that there is an agent  $s_\ell \in \mathcal{A}_1$  that matches with  $c_2$ . There are two situations to  
704 discuss at this time. If  $c_1 \succ_{s_\ell} c_2$ , then (ii) is an unstable matching, which is recorded as case (A); If  
705  $s_\ell$  prefers  $c_2$  more than  $c_1$ , then (ii) is a stable matching and is recorded as event (B).

706 Apply the above two cases (A), (B) to matching (i). In (A),  $c_1$  and  $s_\ell$  prefer each other, so there is a  
707 Top-top match and then  $\tilde{\alpha}$ -condition is satisfied, and a conclusion contradictory to the hypothesis is  
708 derived. In (B), this case will produce two stable matchings, which contradicts Unqc.

709 We use induction to prove it. Suppose, that for all  $(\hat{N}, \hat{K}), \hat{N} \leq N, \hat{K} \leq K, N \geq q_1 + q_2 +$   
710  $\dots + q_K$  the  $\tilde{\alpha}$ -condition is a necessary condition for the uniqueness consistency. Then we prove  
711 for  $(N + 1, q_1 + q_2 + \dots + q_K)$  (similarly, we would have for  $(N, q_1 + q_2 + \dots + q_K + 1)$  and  
712  $q_1 + q_2 + \dots + q_K \geq N$ ). Assume that the newly added agent is  $X$ , select an agent from the original  
713  $N$  agents and record it as  $Y$ . Let  $k_X^*$  and  $k_Y^*$  be the arms rank first for  $X$  and  $Y$  respectively. By the  
714  $K = 2, N = q_1 + q_2$  case proved above, we know that  $X$  and  $Y$  satisfy  $\tilde{\alpha}$ -condition, hence either  $X$   
715 or  $Y$  matches with its first ranked arm. The agent matches with its first ranked arm is denoted by  $s_1$ ,  
716 and the remaining  $N$  agents are  $s_2, \dots, s_N$ . Except  $k_{s_1}^*$  and stable matched agents for  $k_{s_1}^*$ , there are  
717  $N$  agents and  $K - 1$  arms, and  $N \geq q_1 + q_2 + \dots + q_K - q_{k_{s_1}^*}$ . From the inductive hypothesis, we  
718 can know that  $\tilde{\alpha}$ -condition is satisfied.

719 The relationship between  $\tilde{\alpha}$ -condition and *Acyclicity\** is illustrated in Section B.2.4.

720 **B.2.3 Difficulties from *SPC* to  $\tilde{\alpha}$ -condition in regret analysis**

721 When we use the events decomposition for regret minimization block to prove the bound inequality  
722 of the number of times agent  $j$  is pulled (Lemma 6), it requires that  $m^*(j)$  always exit and will  
723 not be deleted. Under *SPC* condition,  $m^*(j)$  always exits as the stable matched partner is the most  
724 preferred one among the remaining market for the certain agent while  $\tilde{\alpha}$ -condition cannot guarantee  
725 this property. Hence, it is important to find conditions or a certain phase with good properties to  
726 guarantee that  $m^*(j)$  will not be globally deleted or locally deleted. And we consider  $F_{\alpha_j}$  and  $V_{\alpha_j}$  in  
727 Lemma 3 (in Appendix A.2) to solve this problem. And since the stable matched pair is not top-top  
728 match in the remaining system under  $\tilde{\alpha}$ -condition while the answer is true under *SPC*, we introduce  
729 a new mapping (Figure 4) to describe the corresponding relationships of stable pairs. In addition,  
730 as shown in Figure 1, *Acyclicity\** is the weakest condition to ensure uniqueness up to now, and  
731 Bettina Klaus and Flip Klijn [20] point that acyclicity has a tight connection with consistency. Hence,  
732 whether we can further weaken  $\tilde{\alpha}$ -condition and propose a new algorithm remains to study.

733 **B.2.4 *Acyclicity\** Guarantees A Unique Stable Matching**

734 **Definition 10.** The preference profile of the arm side  $\mathcal{P}_c$  has a cycle with length  $\ell$  if there exists  
735 integer  $\ell \geq 2, c_1, c_2, \dots, c_\ell$  are  $\ell$  distinct arms and  $s_1, s_2, \dots, s_\ell$  are  $\ell$  distinct agents, subset

736  $T_1, T_2, \dots, T_\ell \subset \mathcal{S} \setminus \{s_1, \dots, s_\ell\}$  and for any  $i \in \{1, 2, \dots, \ell\}$ , the following two conditions are  
 737 satisfied.

738 (P)  $\{s_{i+1}\} \succ_{c_i} \{s_i\} \succ_{c_i} \phi$ , where  $s_{l+1} \equiv s_1$ , and

739 (Q)  $|T_i| = q_{c_i} - 1$  and  $T_i \subseteq U_{c_i}(s_i)$ , where  $U_{c_i}(s_i) = \{s : s \succ_{c_i} s_i\}$ .

740 If  $\mathcal{P}_c$  has no cycle, it satisfies *Acyclicity\**.

741 [2] pointed that *Acyclicity\** is a necessary and sufficient condition for a unique stable matching in  
 742 many-to-one matching. They study the problem with responsive preference<sup>6</sup> and unacceptable agents  
 743 and arms may exist on both sides of the market. Under our setting, both two sides are acceptable,  
 744 and we will prove that *Acyclicity\** is also a necessary and sufficient condition for uniqueness in our  
 745 problem.

746 **Theorem 4.** In our setting, our new  $\tilde{\alpha}$ -condition is a sufficient condition to *Acyclicity\** (Theorem 2  
 747 (iii)).

748 We first see the example above to explain hoe to check whether the *Acyclicity\** is satisfied. As  
 749 mentioned above, the preference profile in Table 1 (1(a))(1(b)) satisfies both *SPC* and  $\tilde{\alpha}$ -condition  
 750 with valid order  $\{(c_2, s_2), (c_3, s_3, s_4), (c_1, s_1, s_5)\}$ . We now check that it also satisfies *Acyclicity\**.

751 From preference profile (1(a)), we can find four cycle:

752 (i)  $s_1 \succ_{c_1} s_2 \succ_{c_2} s_1$ ;

753 (ii)  $s_2 \succ_{c_2} s_3 \succ_{c_3} s_2$ ;

754 (iii)  $s_3 \succ_{c_2} s_1 \succ_{c_1} s_3$ ;

755 (iv)  $s_3 \succ_{c_3} s_1 \succ_{c_1} s_2 \succ_{c_2} s_3$ ;

756 Condition (P) in Definition 10 is satisfied, and we then illustrate that condition (Q) is not satisfied,  
 757 thus *Acyclicity\** holds. For cycle (i),  $T_1, T_2 \subset \mathcal{S} \setminus \{s_1, s_2\}$ ,  $|T_1| = q_{c_1} - 1 = 1$ . However, it violates  
 758  $T_1 \subset U_{c_1}(s_1) = \emptyset$ . Similarly, (ii), (iii), (iv) all imply that *Acyclicity\** is satisfied. For cycle (iv),  
 759  $T_1, T_2, T_3 \subset \mathcal{S} \setminus \{s_1, s_2, s_3\}$ ,  $|T_1| = q_{c_1} - 1 = 1$  while  $T_1 \subset U_{c_1}(s_1) = \emptyset$ . Then, this example also  
 760 satisfies *Acyclicity\**.

761 In fact, we can see from the definitions of these two conditions that *Acyclicity\** only limits the  
 762 preferences of the arm side, while  $\tilde{\alpha}$ -condition limits the preferences of both sides of the market.  
 763 Intuitively, *Acyclicity\** is a more general condition. We now give the theoretical proof.

764 If  $\tilde{\alpha}$ -condition holds, then *Acyclicity\** also holds. By contradiction, if *Acyclicity\** is violated, then  
 765 there is a *cycle* (Definition 10). For preference sequences that can produce stable matchings, as  
 766 long as there is a *cycle* or a ring structure, we can always construct at least two stable matchings  
 767 [29]. For example, for fixed agents set  $\mathcal{S} = \{s_1, s_2, \dots, s_N\}$  and arms set  $\mathcal{C} = \{c_1, c_2, \dots, c_K\}$   
 768 with preference profile  $\mathcal{P}$  and this matching market has stable matching  $m^*$ . If there is a *cycle*  
 769  $s_1 \succ_{c_1} s_2 \succ_{c_2} s_1$ , for this stable matching  $m^*$  containing  $(s_1, c_1), (s_2, c_2)$ , when other matching  
 770 pairs remain unchanged,  $(s_2, c_1), (s_1, c_2)$  with other pairs can lead to a new stable matching. Thus  
 771 the uniqueness is violated, and then  $\tilde{\alpha}$ -condition is also violated.

772 Conversely, we consider a counterexample that *Acyclicity\** holds while  $\tilde{\alpha}$ -condition may not hold.

773 From Table 2, we now explain that a market with arms  $c_1, c_2, c_3$ , agents  $s_1, s_2, s_3, s_4, s_5$ , and capacity  
 774  $q = (2, 1, 2)$  with preference (2(a)) and (2(b)) satisfies *Acyclicity\** and can lead to a unique stable  
 775 matching but does not satisfy  $\tilde{\alpha}$ -condition. We run GS Algorithm in many-to-one market and  
 776 obtain stable matching  $\{(c_1; s_2, s_5), (c_2; s_1), (c_3; s_3, s_4)\}$ . And *Acyclicity\** is easily verified. After  
 777 eliminating  $(c_3; s_3, s_4)$ , only  $s_1, s_2, s_5, c_1, c_2$  remain in the system, and then the preference profile  
 778 is represented as (2(c)) and (2(d)) in Table 2. Apparently, this preference can produce two stable  
 779 matching. Thus,  $\tilde{\alpha}$ -condition is violated.

780 **Theorem 5.** Suppose that  $(\mathcal{K}, \mathcal{J}, \mathcal{P})$  are arbitrarily fixed.  $\mathcal{P}_c$  and  $\mathcal{P}_s$  are the preference profiles of  
 781 arms and agents respectively. Then,  $\mathcal{P}_c$  satisfies *Acyclicity\** if and only if there is a unique stable  
 782 matching in many-to-one setting for each  $\mathcal{P}_s$ .

<sup>6</sup>The *responsive preference* here means that if only one student in the two matchings is different, the college prefers the matching containing the preferred student.

Table 2: Preference Profiles

| (a) Exm3: Arms |                               | (b) Exm3: Agents |                   |
|----------------|-------------------------------|------------------|-------------------|
| $c_1 :$        | $s_1 > s_2 > s_5 > s_3 > s_4$ | $s_1 :$          | $c_2 > c_3 > c_1$ |
| $c_2 :$        | $s_2 > s_1 > s_4 > s_3 > s_5$ | $s_2 :$          | $c_1 > c_2 > c_3$ |
| $c_3 :$        | $s_1 > s_3 > s_2 > s_4 > s_5$ | $s_3 :$          | $c_3 > c_1 > c_2$ |
|                |                               | $s_4 :$          | $c_1 > c_2 > c_3$ |
|                |                               | $s_5 :$          | $c_1 > c_2 > c_3$ |
| (c) Exm3: Arms |                               | (d) Exm3: Agents |                   |
| $c_1 :$        | $s_1 > s_2 > s_5$             | $s_1 :$          | $c_2 > c_1$       |
| $c_2 :$        | $s_2 > s_1 > s_5$             | $s_2 :$          | $c_1 > c_2$       |
|                |                               | $s_5 :$          | $c_1 > c_2$       |

783 *Proof.* In order to prove this theorem, we first introduce a lemma.

784 **Lemma 8.** For a given  $\mathcal{P}$ , suppose that there are two stable matchings under  $\mathcal{P}$ :  $\mu, \mu'$ , then [2]

- 785 •  $|\mu(s)| = |\mu'(s)|$  for each  $s \in \mathcal{J}$  and  $|\mu(c)| = |\mu'(c)|$  for each  $c \in \mathcal{K}$ .  
786 Moreover, for each  $c \in \mathcal{K}$  with  $\mu'(c) \neq \mu(c)$ ,  
787 •  $|\mu(c)| = |\mu'(c)| = q_c$ ;  
788 •  $\mu(c) \setminus \mu'(c) \neq \emptyset$  and  $\mu'(c) \setminus \mu(c) \neq \emptyset$ ;  
789 • if  $\mu'(c) \succ_c \mu(c)$ , then for each  $s' \in \mu'(c)$  and  $s \in \mu(c) \setminus \mu'(c)$ ,  $\{s'\} \succ_c \{s\}$ .

790  $\Rightarrow$ ) : **Necessity:** We complete this proof by contradiction. Suppose there are at least two distinct  
791 stable matchings under  $\mathcal{P}$ . From GS algorithm [12], there exists optimal matchings  $\mu^s$  and  $\mu^c$ , s.t.  
792  $\mu^c \succ_c \mu^s$  and  $\mu^s \succ_s \mu^c$ . Under the multi-stability assumption,  $\mu^s \neq \mu^c$ . Then,  $\exists c_0 \in \mathcal{K}$ , s.t.  
793  $\mu^s(c_0) \neq \mu^c(c_0)$ , and by the optimality of  $\mu^c$ ,  $\mu^c(c_0) \succ_{c_0} \mu^s(c_0)$ . Consider the following algorithm:

- 794 • Step 1: Choose  $c_1 \in \mathcal{K}$ , such that  $\mu^s(c_1) \neq \mu^c(c_1)$  and choose  $s_2 \in \mathcal{J}$ , such that  
795  $s_2 \in \mu^c(c_1) \setminus \mu^s(c_1)$ . Choose  $c_2 \in \mathcal{K} \setminus \{c_1\}$ ,  $\{c_2\} = \mu^s(s_2)$ . Go to step 2;  
796 • Step  $k$  ( $k \geq 2$ ): Choose  $s_{k+1} \in \mathcal{J}$ , such that  $s_{k+1} \in \mu^c(c_k) \setminus \mu^s(c_k)$  and  $c_{k+1} \in \mathcal{K} \setminus \{c_k\}$ ,  
797 s.t.  $\{c_{k+1}\} = \mu^s(s_{k+1})$ . If  $c_{k+1} \in \{c_1, c_2, \dots, c_k\}$ , then the algorithm terminates. If not,  
798 go to the next step.  
799 • Result: If the algorithm terminates at Step  $\ell$  ( $\ell \geq 2$ ) with  $c_{\ell+1} = c_j$  ( $j \geq 1$ ), then the result  
800 is:

801 Given the students  $\{s_{j+1}, s_{j+2}, \dots, s_{\ell+1}\}$  and the college  $\{c_j, c_{j+1}, \dots, c_\ell\}$ , there is a  
802 cycle:  $s_{\ell+1} \succ_{c_\ell} s_\ell \dots s_{j+2} \succ_{c_{j+1}} s_{j+1} \succ_{c_j} s_j$ , then condition (P) is satisfied. Let  
803  $T_k = \mu^c(c_k) \setminus \{s_k\}$ ,  $k \in \{j, j+1, \dots, \ell\}$ , since each agent ultimately matches only one  
804 arm,  $\mu^c(c_j), \mu^c(c_{j+1}), \dots, \mu^c(c_\ell)$  are mutually disjoint, then  $T_j, T_{j+1}, \dots, T_\ell$  are disjoint.  
805 And by the definition of  $T_k$ ,  $k \in \{j, j+1, \dots, \ell\}$ ,  $T_k$  does not contain any agent in  
806  $\{s_{j+1}, s_{j+2}, \dots, s_{\ell+1}\}$ . By the second property in Lemma 8,  $|T_k| = q_{c_k} - 1$  and by the  
807 last property,  $T_k \subset U_{c_k}(s_k)$ .

808 Hence, there is a cycle (Definition 10), which induces a contradiction.

809  $\Leftarrow$ ) : **Sufficiency:** Assume that there exists a cycle  $s_{\ell+1} \succ_{c_\ell} s_\ell \dots s_3 \succ_{c_2} s_2 \succ_{c_1} s_1, s_{\ell+1} \equiv s_1$ ,  
810 and  $|T_i| = q_{c_i} - 1, T_{c_i} \subseteq U_{c_i}(s_i)$ , then we construct preference profiles for both arms (Figure B.2.4)  
811 and agents (Figure B.2.4):

812 Then we can find two distinct matchings  $\mu^c$  and  $\mu^s$  (Figure B.2.4 and Figure B.2.4), which induce a  
813 contradiction.

814 □



Table 3: Preference Profile of  $\mathcal{K}$ .

| note            | $c_1$            | $c_2$            | $\dots\dots$ | $c_{\ell-1}$            | $c_\ell$            | $c_{\ell+1}$ | $\dots\dots$ | $c_k$    |
|-----------------|------------------|------------------|--------------|-------------------------|---------------------|--------------|--------------|----------|
| 1               | $s_2$            | $s_3$            | $\dots\dots$ | $s_\ell$                | $s_1$               | *            | $\dots\dots$ | *        |
| 2               | $s_{\ell+2}$     | $s_{\ell+2}$     | $\dots\dots$ | $s_{\ell+2}$            | $s_{\ell+2}$        | *            | $\dots\dots$ | *        |
| $\vdots$        | $\vdots$         | $\vdots$         | $\dots\dots$ | $\vdots$                | $\vdots$            | $\vdots$     | $\dots\dots$ | $\vdots$ |
|                 | $s_{\ell+1+q_1}$ | $\vdots$         | $\dots\dots$ | $s_{\ell+1+q_{\ell-1}}$ | $\vdots$            | $\vdots$     | $\dots\dots$ | $\vdots$ |
| $q_i$           | $s_{\ell+1+q_2}$ | $\vdots$         | $\dots\dots$ | $\vdots$                | $s_{\ell+1+q_\ell}$ | $\vdots$     | $\dots\dots$ | $\vdots$ |
|                 | $s_{\ell+2+q_1}$ | $s_{\ell+2+q_2}$ | $\dots\dots$ | $s_{\ell+2+q_{\ell-1}}$ | $s_{\ell+2+q_\ell}$ |              | $\dots\dots$ |          |
|                 | $s_{\ell+3+q_1}$ | $s_{\ell+3+q_2}$ | $\dots\dots$ | $s_{\ell+3+q_{\ell-1}}$ | $s_{\ell+3+q_\ell}$ |              | $\dots\dots$ |          |
|                 | $\vdots$         | $\vdots$         | $\dots\dots$ | $\vdots$                | $\vdots$            |              | $\dots\dots$ |          |
|                 | $s_N$            | $s_N$            | $\dots\dots$ | $s_N$                   | $s_N$               |              | $\dots\dots$ |          |
| The remaining   | $s_1$            | $s_1$            | $\dots\dots$ | $s_1$                   | $s_2$               |              |              |          |
| of $\{s_\ell\}$ | $s_3$            | $s_2$            | $\dots\dots$ | $s_2$                   | $s_3$               |              |              |          |
| are ranked      | $\vdots$         | $s_4$            | $\dots\dots$ | $\vdots$                | $\vdots$            |              |              |          |
| at last         | $\vdots$         | $\vdots$         | $\dots\dots$ | $\vdots$                | $\vdots$            |              |              |          |
|                 | $s_\ell$         | $s_\ell$         | $\dots\dots$ | $s_{\ell-1}$            | $s_\ell$            |              |              |          |

Table 4: Preference Profile of  $\mathcal{J}$ .

| $s_1$                           | $s_2$                        | $\dots\dots$ | $s_{\ell-1}$                               | $s_\ell$                               | $s_{\ell+1}$ | $\dots\dots$ | $s_N$    |
|---------------------------------|------------------------------|--------------|--------------------------------------------|----------------------------------------|--------------|--------------|----------|
| $c_1$                           | $c_2$                        | $\dots\dots$ | $s_{\ell-1}$                               | $s_1$                                  | *            | $\dots\dots$ | *        |
| $c_\ell$                        | $c_1$                        | $\dots\dots$ | $c_{\ell-2}$                               | $c_{\ell-1}$                           | *            | $\dots\dots$ | *        |
| $\vdots$                        | $\vdots$                     | $\dots\dots$ | $\vdots$                                   | $\vdots$                               | $\vdots$     | $\dots\dots$ | $\vdots$ |
| $[K] \setminus \{c_1, c_\ell\}$ | $[K] \setminus \{c_2, c_1\}$ | $\dots\dots$ | $[K] \setminus \{c_{\ell-1}, c_{\ell-2}\}$ | $[K] \setminus \{c_\ell, c_{\ell-1}\}$ | *            | $\dots\dots$ | *        |

Table 5:  $\mu^c$ .

| $c_1$ | $c_2$ | $\dots\dots$ | $c_{\ell-1}$ | $c_\ell$ | $c_{\ell+1}$ | $\dots\dots$ | $c_K$ |
|-------|-------|--------------|--------------|----------|--------------|--------------|-------|
| $s_2$ | $s_3$ | $\dots\dots$ | $s_\ell$     | $s_1$    | *            | $\dots\dots$ | *     |
| *     | *     | $\dots\dots$ | *            | *        | *            | $\dots\dots$ | *     |

Table 6:  $\mu^s$ .

| $c_1$ | $c_2$ | $\dots\dots$ | $c_{\ell-1}$ | $c_\ell$ | $c_{\ell+1}$ | $\dots\dots$ | $c_K$ |
|-------|-------|--------------|--------------|----------|--------------|--------------|-------|
| $s_1$ | $s_2$ | $\dots\dots$ | $s_{\ell-1}$ | $s_\ell$ | *            | $\dots\dots$ | *     |
| *     | *     | $\dots\dots$ | *            | *        | *            | $\dots\dots$ | *     |

## 815 C More Discussions about Our Work

### 816 C.1 Stability in Many-to-one Setting

817 Stable matchings always exist in one-to-one market [12] while the answer is not necessarily  
818 correct under many-to-one setting [32]. [32] points out that responsive preference (RP) that can  
819 refrain from this unexpectation. Our work assume that arm preference profiles are over individuals  
820 rather than agents sets, which naturally satisfies RP [35]<sup>7</sup>.

<sup>7</sup>This assumption [32, 2, 3] in our setting states that the addition of another agent  $p_{i''}$  will not influence the preference ranking for an arm to agent  $p_i$  and  $p_{i'}$ , i.e.  $p_{i''} \cup p_i \succ_{a_j} p_{i''} \cup p_{i'}$  is equivalent to  $p_{i'} \succ_{a_j} p_i$

## C.2 Some Details about Algorithm

**Multi-phases to Reduce Collisions** In previous work, the CA-UCB algorithm [22] was proposed to manage conflicts in the decentralized market combined with the bandit algorithm, but it has limitations for more general preference structures. In CA-UCB, if we set the delay probability for all agents as zero, then agents may fall into infinite loops and cause high regret. To avoid linear regret, the paper of [34] applies a phased UCB algorithm with arm elimination in the one-to-one setting. Our MO-UCB-D4 algorithm in many-to-one matching is also carried out in multi-phases for conflict management. The multi-phases is to guarantee that the active set in different phases has no inclusion relationship so that if an agent deletes an arm in a phase, this arm can still be selected in the later phases. This ensures when the agent wrongly deletes an arm, it will not lead to linear regret.

**Parameter Selection and Scale** The parameter  $\theta \in (0, 1/K)$  in our MO-UCB-D4 algorithm is chosen for the local deletion threshold. Increasing the threshold leads to higher regret until local deletion vanishes. This happens as more collisions are allowed until an arm is deleted. But higher threshold allows for quick detection of the stable matched arms. However, decreasing the threshold results in a more aggressive deletion and then lower regret from collision each phase, at a cost of longer detection time for the stable matched arms. Therefore, there is a trade-off when choosing  $\theta$  and we can design an algorithm to iteratively update  $\theta$  based on the previous information.

**Baseline experimental design** Although our work mainly focuses on theory and therefore we did not put much emphasis on the experimental evaluation, we still carefully design our experiments to test the robustness of our algorithm across different environments. Since our work is the first one to study the many-to-one setting with uniqueness conditions, there is indeed no comparable baselines. It is possible to design some sub-optimal algorithms in which each agent runs a MAB algorithm independently and there is no communication block among agents. However, such algorithm may not find the stable matching and thus suffers a linear regret.

**Optimality of our bound and the lower bound** Recall that our bound is  $O(NK \frac{\log(T)}{\Delta^2})$ . There exists a lower bound of  $O(\frac{\log(T)}{\Delta^2})$  under the setting where arms have the same and known preferences [34], which is a special case of our setting. Our bound is optimal in terms of  $T$  and  $\Delta$ . For  $N$ , since each agent  $j$  needs to face collisions from non-dominated arms and other agents, regret is bounded over the summation of agents and thus leads to the term  $O(N)$ . Usually in a multi-player decentralized setting [5, 30], each agent will suffer regret of term  $N$  since it will be collided with other agents. Thus we conjecture such  $N$  is unavoidable. For  $K$ , since in decentralized setting, agents have no knowledge of arm preference, each agent needs to try each  $O(\log(T)/\Delta^2)$  times to identify the stable matched arm. And it may get collided when pulling the other agent's stable matched arm, thus leading to the term  $K$ .  $K$  might be removed for those agents who may never get collisions due to special market structure.

## C.3 Strict Preference and “Indifferent Agents”

Our work focuses on strict preference rather than the more general case that considering indifferent agents. As far as we know, a lot of works studying the traditional (offline) matching markets would assume preferences to be strict [12, 19, 15, 25, 2], perhaps due to the reason of simplicity. Our work mainly follows these existing settings of the offline matching markets [12, 19, 15, 25, 2] and the bandit learning on the one-to-one matching markets [7, 21, 34, 22] that assume strict preferences.

Note that if the agents are indifferent (or nearly indifferent) over the arms that are far down the ranking lists and do not affect the stable matching, our algorithm and analysis can actually go through. The gap appeared in the regret bound actually depends only on the those “(nearly) optimal” arms that appear in the stable matching or are the best among those not appeared in the stable matching.

Recall that our setting is to learn a particular stable matching, like previous works [7, 21, 34, 22] learning the unique, or agent-pessimal/optimal stable matching on the one-to-one setting. Under this objective, if the agents are nearly indifferent, not exactly indifferent, over “(nearly) optimal” arms, no matter how small the gap is, the agents will need to figure out the which arm is better and the gap appears as the learning hardness. This phenomenon is common in multi-armed bandits where differentiating the optimal arm and the second optimal arm is the most difficult part of the learning.

872 Then one might be curious about the objective to learn a “nearly stable matching”. This would be  
873 more general and would prefer to leave it as interesting future work.

874 For the case when agents are exactly indifferent on “(nearly) optimal” arms, the stable matchings  
875 would not be unique. In this case, the communication block and the global deletion set of our  
876 algorithm need to be revised to allow each agent to keep more than one stable matched arm. Note  
877 that after this revision, the selected matching will not become fixed during interactions and will  
878 switch between all optimal stable matchings since the learning algorithm needs to continue exploring  
879 these arms to take precautions against the case of small gap. This will result in a phenomenon of  
880 fast-changing matching-selections, compared with our setting and most previous works [7, 21, 34, 22]  
881 where the learning algorithm tends to stick on a specific matching in the latter learning period.

#### 882 **C.4 Future Directions for Many-to-one Setting**

883 First, we propose some interesting directions about setting. This paper considers preference over  
884 individuals rather than agents sets. For example, when the first and fourth employees have cooperation  
885 experience and the second and third employees have no cooperation experience before, the company  
886 may prefer to recruit 1-st and 4-th together rather than 1-st, 2-nd or 2-nd, 3-rd. That is,  $1, 4 \succ_k 2, 3$   
887 may occur for arm  $k$  and  $1, 2, 3, 4 \in [N]$ . Further research can also take this combination effect as  
888 the starting point. We assume that the preferences over agents for arms are known in our setting<sup>8</sup>.  
889 When multiple agents are accepted by one arm simultaneously, the ranking of these agents cannot be  
890 judged if under the assumption of unknown preference ranking. Therefore, the algorithm for rank  
891 estimation still needs further design. And our work is based on fixed finite agents set and arms set,  
892 thus how to generalize this setting to a dynamic one?

---

<sup>8</sup>The preference profile over arms for agents is unknown in our setting, and needed to be learned.
